# Supplementary material for: A two-tiered unsupervised clustering approach for drug repositioning through heterogeneous data integration
Source: PubMed Central journal article supplement (PMC5896044; doi:10.1186/s12859-018-2123-4), 2018-04-11

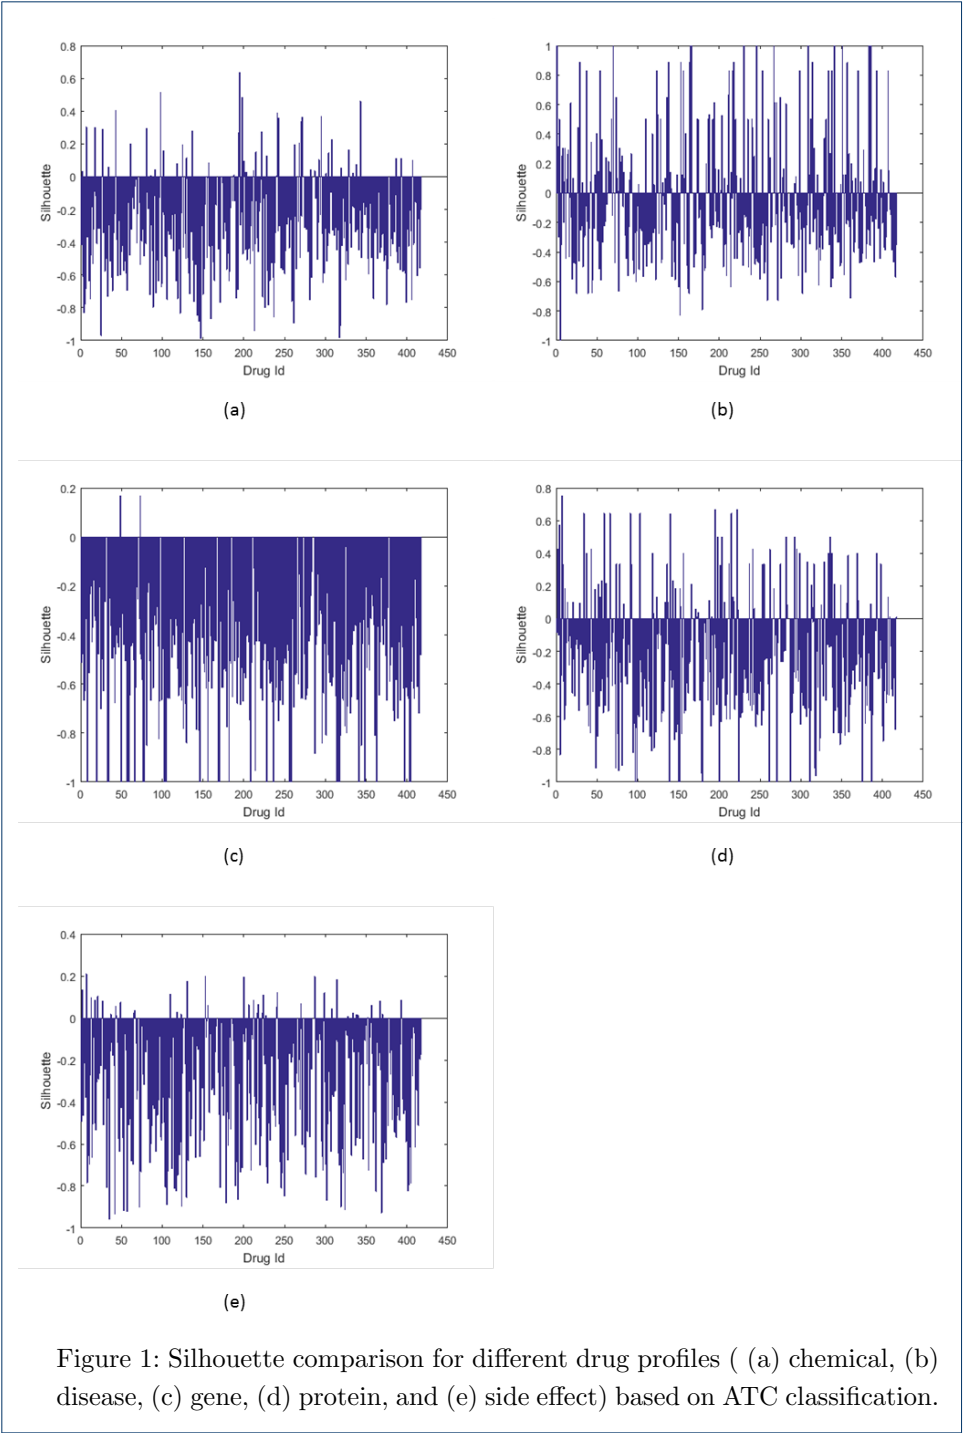

Figure 1: Silhouette comparison for different drug profiles ( (a) chemical, (b) disease, (c) gene, (d) protein, and (e) side effect) based on ATC classification.

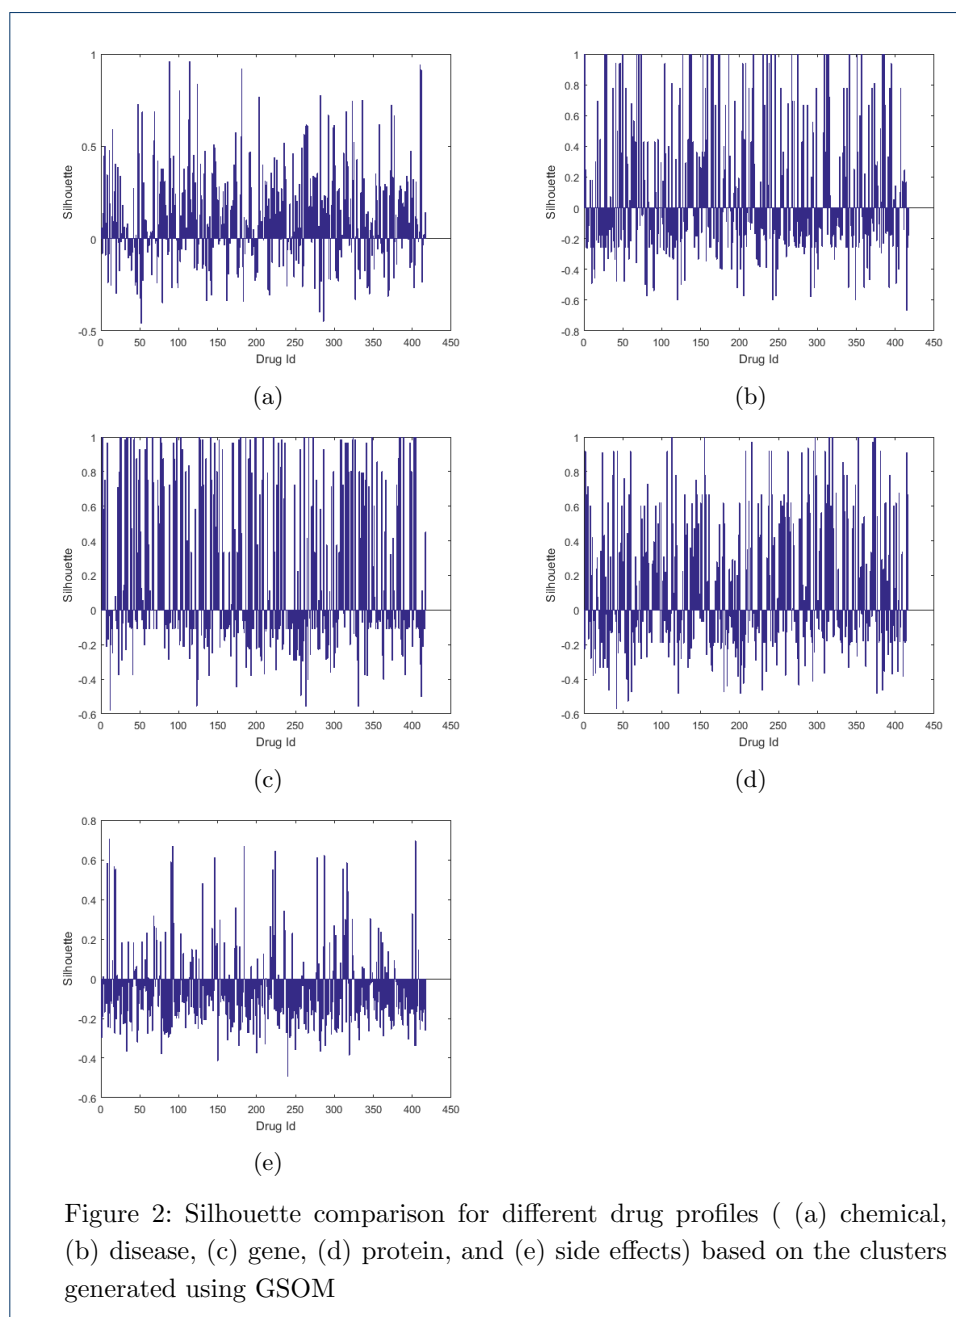

Supplement: 12859_2018_2123_MOESM1_ESM.pdf [file 12859_2018_2123_MOESM1_ESM.pdf]
