# Supplementary material for: A two-tiered unsupervised clustering approach for drug repositioning through heterogeneous data integration
Source: PubMed Central journal article supplement (PMC5896044; doi:10.1186/s12859-018-2123-4), 2018-04-11
Supplement: 12859_2018_2123_MOESM2_ESM.pdf [file 12859_2018_2123_MOESM2_ESM.pdf]

| Drug 1              | ATC L2  | Drug 2             | ATC L2      |
|---------------------|---------|--------------------|-------------|
| Alclometasone       | D07/S01 | amcinonide         | D07         |
| Alclometasone       | D07/S01 | Desoximetasone     | D07         |
| Alclometasone       | D07/S01 | prednicarbate      | D07         |
| amcinonide          | D07     | desoximetasone     | D07         |
| amcinonide          | D07     | prednicarbate      | D07         |
| anastrozole         | L02     | letrozole          | L02         |
| ciclesonide         | R01/R03 | mometasone         | R01/R03/D07 |
| Desoximetasone      | D07     | prednicarbate      | D07         |
| Enalapril           | C09     | ramipril           | C09         |
| Enflurane           | N01     | halothane          | N01         |
| Fluphenazine        | N05     | Thioridazine       |             |
| Fluvoxamine         | N06     | sertraline         | N06         |
| Fosinopril          | C09     | lisinopril         | C09         |
| Fosinopril          | C09     | trandolapril       | C09         |
| Fosinopril          | C09     | lisinopril         | C09         |
| Fosinopril          | C09     | trandolapril       | C09         |
| Hydrochlorothiazide | C03     | hydroflumethiazide | C03         |
| Hydrochlorothiazide | C03     | methyclothiazide   | C03         |
| Hydrochlorothiazide | C03     | methyclothiazide   | C03         |
| irbesartan          | C09     | valsartan          | C09         |
| Lisinopril          | C09     | trandolapril       | C09         |
| Lovastatin          | C10     | pravastatin        | C10         |
| Lovastatin          | C10     | simvastatin        | C10         |
| Pentobarbital       | N05     | secobarbital       | N05         |
| Pravastatin         | C10     | simvastatin        | C10         |
| Tolazamide          | A10     | tolbutamide        | A10/V04     |
