# Supplementary material for: A two-tiered unsupervised clustering approach for drug repositioning through heterogeneous data integration
Source: PubMed Central journal article supplement (PMC5896044; doi:10.1186/s12859-018-2123-4), 2018-04-11
Supplement: 12859_2018_2123_MOESM3_ESM.pdf [file 12859_2018_2123_MOESM3_ESM.pdf]

| <b>Drug Name</b>  | <b>Cluster ID</b> | <b>Old ATC</b> | <b>New ATC</b> | <b>Confidence</b> | <b>Algorithm</b> |
|-------------------|-------------------|----------------|----------------|-------------------|------------------|
| Allopurinol       | 5                 | M04            | L01            | 0.15              | CL1              |
| Allopurinol       | 417               | M04            | L01            | 0.10              | MCL              |
| Amantadine        | 51                | N04            | N05            | 0.80              | CL1              |
| Amantadine        | 37                | N04            | N05            | 0.23              | CL1              |
| Amifostine        | 5                 | V03            | L01            | 0.15              | CL1              |
| Amifostine        | 417               | V03            | L01            | 0.10              | MCL              |
| Amiloride         | 32                | C03            | C09            | 0.33              | CL1              |
| Amiloride         | 53                | C03            | C09            | 0.33              | MCODE            |
| Aminoglutethimide | 52                | L02            | N04            | 0.25              | MCODE            |
| Aminoglutethimide | 1                 | L02            | A10            | 0.21              | GSOM             |
| Aminoglutethimide | 30                | L02            | N03            | 0.17              | CL1              |
| Aminoglutethimide | 30                | L02            | N04            | 0.17              | CL1              |
| Aminoglutethimide | 16                | L02            | A10            | 0.12              | CL1              |
| Aminoglutethimide | 16                | L02            | N03            | 0.12              | CL1              |
| Amiodarone        | 56                | C01            | N01            | 0.25              | GSOM             |
| Amiodarone        | 23                | C01            | N01            | 0.15              | CL1              |
| Amlodipine        | 403               | C08            | C09            | 0.85              | MCL              |
| Amlodipine        | 11                | C08            | C09            | 0.70              | CL1              |
| Apraclonidine     | 5                 | S01            | L01            | 0.15              | CL1              |
| Apraclonidine     | 417               | S01            | L01            | 0.10              | MCL              |
| Aripiprazole      | 45                | N05            | N06            | 0.47              | CL1              |
| Aripiprazole      | 31                | N05            | N06            | 0.40              | CL1              |
| Aripiprazole      | 60                | N05            | A03            | 0.20              | CL1              |
| Aripiprazole      | 60                | N05            | C03            | 0.20              | CL1              |
| Aripiprazole      | 60                | N05            | G04            | 0.20              | CL1              |
| Aripiprazole      | 53                | N05            | A03            | 0.17              | CL1              |
| Aripiprazole      | 53                | N05            | C03            | 0.17              | CL1              |
| Aripiprazole      | 53                | N05            | G04            | 0.17              | CL1              |
| Atorvastatin      | 3                 | C10            | N05            | 0.27              | CL1              |
| Atorvastatin      | 58                | C10            | N05            | 0.15              | CL1              |
| Atovaquone        | 24                | P01            | L01            | 0.25              | MCODE            |
| Atovaquone        | 5                 | P01            | L01            | 0.15              | CL1              |
| Atropine          | 48                | A03            | N04            | 0.50              | CL1              |
| Atropine          | 48                | S01            | N04            | 0.50              | CL1              |
| Atropine          | 393               | A03            | N04            | 0.50              | MCL              |
| Atropine          | 20                | A03            | N04            | 0.46              | GSOM             |
| Atropine          | 20                | S01            | N04            | 0.46              | GSOM             |
| Azelastine        | 33                | S01            | A10            | 0.25              | MCODE            |
| Azelastine        | 28                | S01            | A10            | 0.13              | CL1              |
| Brinzolamide      | 48                | S01            | L02            | 0.67              | MCODE            |
| Brinzolamide      | 9                 | S01            | L02            | 0.17              | CL1              |
| Bromocriptine     | 61                | N04            | N05            | 0.27              | CL1              |
| Bromocriptine     | 0                 | N04            | N05            | 0.07              | MCODE            |
| Bumetanide        | 28                | C03            | A10            | 0.13              | CL1              |
| Bumetanide        | 28                | C03            | N03            | 0.13              | CL1              |
| Bumetanide        | 16                | C03            | A10            | 0.12              | CL1              |
| Bumetanide        | 16                | C03            | N03            | 0.12              | CL1              |
| Caffeine          | 86                | N06            | C04            | 0.20              | GSOM             |
| Caffeine          | 86                | N06            | N07            | 0.20              | GSOM             |

|                 |         |     |            |
|-----------------|---------|-----|------------|
| Caffeine        | 86 N06  | S01 | 0.20 GSOM  |
| Caffeine        | 8 N06   | C04 | 0.11 MCODE |
| Caffeine        | 8 N06   | N07 | 0.11 MCODE |
| Caffeine        | 8 N06   | S01 | 0.11 MCODE |
| Capecitabine    | 3 L01   | N05 | 0.27 CL1   |
| Capecitabine    | 0 L01   | N05 | 0.07 MCODE |
| Carbachol       | 86 N07  | C04 | 0.20 GSOM  |
| Carbachol       | 86 N07  | N06 | 0.20 GSOM  |
| Carbachol       | 86 S01  | C04 | 0.20 GSOM  |
| Carbachol       | 86 S01  | N06 | 0.20 GSOM  |
| Carbachol       | 8 N07   | C04 | 0.11 MCODE |
| Carbachol       | 8 N07   | N06 | 0.11 MCODE |
| Carbachol       | 8 S01   | C04 | 0.11 MCODE |
| Carbachol       | 8 S01   | N06 | 0.11 MCODE |
| Carbamazepine   | 46 N03  | N05 | 0.43 GSOM  |
| Carbamazepine   | 46 N03  | N06 | 0.43 GSOM  |
| Carbamazepine   | 25 N03  | N06 | 0.27 CL1   |
| Carbamazepine   | 42 N03  | N05 | 0.23 CL1   |
| Carbamazepine   | 20 N03  | N05 | 0.20 MCODE |
| Carbamazepine   | 20 N03  | N06 | 0.20 MCODE |
| Cefazolin       | 8 J01   | L01 | 0.22 CL1   |
| Cefazolin       | 24 J01  | L01 | 0.12 CL1   |
| Chloramphenicol | 5 G01   | L01 | 0.18 MCODE |
| Chloramphenicol | 5 J01   | L01 | 0.18 MCODE |
| Chloramphenicol | 5 S01   | L01 | 0.18 MCODE |
| Chloramphenicol | 5 S03   | L01 | 0.18 MCODE |
| Chloramphenicol | 24 G01  | L01 | 0.12 CL1   |
| Chloramphenicol | 24 S01  | L01 | 0.12 CL1   |
| Chloramphenicol | 24 S03  | L01 | 0.12 CL1   |
| Chloramphenicol | 417 G01 | L01 | 0.10 MCL   |
| Chloramphenicol | 417 J01 | L01 | 0.10 MCL   |
| Chlorzoxazone   | 88 M03  | P03 | 0.40 GSOM  |
| Chlorzoxazone   | 8 M03   | P03 | 0.11 MCODE |
| Ciclesonide     | 33 R01  | D07 | 0.24 CL1   |
| Ciclesonide     | 412 R01 | D07 | 0.24 MCL   |
| Ciprofloxacin   | 8 S02   | L01 | 0.22 CL1   |
| Ciprofloxacin   | 417 S02 | L01 | 0.10 MCL   |
| Clonidine       | 56 C02  | N05 | 0.62 CL1   |
| Clonidine       | 56 S01  | N05 | 0.62 CL1   |
| Clonidine       | 61 C02  | N05 | 0.27 CL1   |
| Clonidine       | 61 S01  | N05 | 0.27 CL1   |
| Clotrimazole    | 371 D01 | J02 | 0.20 MCL   |
| Clotrimazole    | 55 D01  | J02 | 0.18 GSOM  |
| Cyproheptadine  | 46 R06  | N06 | 0.70 CL1   |
| Cyproheptadine  | 35 R06  | N06 | 0.59 CL1   |
| Cyproheptadine  | 4 R06   | N06 | 0.54 CL1   |
| Cyproheptadine  | 56 R06  | N06 | 0.25 MCODE |
| Dexmedetomidine | 52 N05  | N01 | 0.30 CL1   |
| Dexmedetomidine | 366 N05 | N01 | 0.25 MCL   |
| Dexrazoxane     | 12 V03  | L01 | 0.33 CL1   |

|                   |         |     |            |
|-------------------|---------|-----|------------|
| Dexrazoxane       | 24 V03  | L01 | 0.33 GSOM  |
| Diazoxide         | 5 V03   | L01 | 0.15 CL1   |
| Diazoxide         | 417 C02 | L01 | 0.10 MCL   |
| Diazoxide         | 13 C02  | L01 | 0.06 MCODE |
| Diazoxide         | 13 V03  | L01 | 0.06 MCODE |
| Didanosine        | 92 J05  | B01 | 0.33 GSOM  |
| Didanosine        | 92 J05  | L01 | 0.33 GSOM  |
| Didanosine        | 5 J05   | L01 | 0.15 CL1   |
| Didanosine        | 24 J05  | L01 | 0.12 CL1   |
| Didanosine        | 13 J05  | B01 | 0.06 MCODE |
| Didanosine        | 13 J05  | L01 | 0.06 MCODE |
| Dihydroergotamine | 61 N02  | N05 | 0.27 CL1   |
| Dihydroergotamine | 42 N02  | N05 | 0.23 CL1   |
| Disulfiram        | 24 N07  | L01 | 0.12 CL1   |
| Disulfiram        | 13 N07  | L01 | 0.06 MCODE |
| Dolasetron        | 2 A04   | A02 | 0.40 MCODE |
| Dolasetron        | 59 A04  | L01 | 0.20 CL1   |
| Dolasetron        | 40 A04  | A02 | 0.20 GSOM  |
| Dolasetron        | 24 A04  | L01 | 0.12 CL1   |
| Doxazosin         | 60 C02  | G04 | 0.20 CL1   |
| Doxazosin         | 60 C02  | N05 | 0.20 CL1   |
| Doxazosin         | 58 C02  | G04 | 0.15 CL1   |
| Doxazosin         | 58 C02  | N05 | 0.15 CL1   |
| Droperidol        | 28 N05  | N01 | 0.42 GSOM  |
| Droperidol        | 359 N05 | N03 | 0.40 MCL   |
| Droperidol        | 40 N05  | N01 | 0.32 CL1   |
| Droperidol        | 30 N05  | N03 | 0.17 CL1   |
| Entacapone        | 15 N04  | L01 | 0.17 MCODE |
| Entacapone        | 24 N04  | L01 | 0.12 CL1   |
| Eplerenone        | 28 C03  | J01 | 0.25 MCODE |
| Eplerenone        | 41 C03  | J01 | 0.17 GSOM  |
| Ethotoin          | 1 N03   | C03 | 0.22 CL1   |
| Ethotoin          | 28 N03  | A10 | 0.13 CL1   |
| Ethotoin          | 28 N03  | C03 | 0.13 CL1   |
| Ethotoin          | 16 N03  | A10 | 0.12 CL1   |
| Ezetimibe         | 373 C10 | A02 | 0.27 MCL   |
| Ezetimibe         | 22 C10  | A02 | 0.20 CL1   |
| Famotidine        | 11 A02  | C10 | 0.27 GSOM  |
| Famotidine        | 22 A02  | C10 | 0.20 CL1   |
| Fenofibrate       | 373 C10 | A02 | 0.27 MCL   |
| Fenofibrate       | 22 C10  | A02 | 0.20 CL1   |
| Fulvestrant       | 23 L02  | A10 | 0.42 GSOM  |
| Fulvestrant       | 13 L02  | A10 | 0.42 CL1   |
| Furosemide        | 60 C03  | A03 | 0.20 CL1   |
| Furosemide        | 60 C03  | G04 | 0.20 CL1   |
| Furosemide        | 60 C03  | N05 | 0.20 CL1   |
| Furosemide        | 53 C03  | A03 | 0.17 CL1   |
| Furosemide        | 53 C03  | G04 | 0.17 CL1   |
| Furosemide        | 53 C03  | N05 | 0.17 CL1   |
| Gefitinib         | 92 L01  | B01 | 0.33 GSOM  |

|                  |         |     |            |
|------------------|---------|-----|------------|
| Gefitinib        | 92 L01  | J05 | 0.33 GSOM  |
| Gefitinib        | 13 L01  | B01 | 0.06 MCODE |
| Gefitinib        | 13 L01  | J05 | 0.06 MCODE |
| Glimepiride      | 33 A10  | R06 | 0.25 MCODE |
| Glimepiride      | 28 A10  | R06 | 0.13 CL1   |
| Hexachlorophene  | 11 D08  | C10 | 0.27 GSOM  |
| Hexachlorophene  | 22 D08  | C10 | 0.20 CL1   |
| Hydroxocobalamin | 52 B03  | L02 | 0.25 MCODE |
| Hydroxocobalamin | 52 V03  | L02 | 0.25 MCODE |
| Hydroxocobalamin | 9 B03   | L02 | 0.17 CL1   |
| Hydroxocobalamin | 9 V03   | L02 | 0.17 CL1   |
| Imiquimod        | 58 D06  | S01 | 0.33 GSOM  |
| Imiquimod        | 12 D06  | S01 | 0.20 MCODE |
| Indapamide       | 1 C03   | L01 | 0.27 MCODE |
| Indapamide       | 24 C03  | L01 | 0.12 CL1   |
| Ivermectin       | 11 D11  | C10 | 0.27 GSOM  |
| Ivermectin       | 11 P02  | C10 | 0.27 GSOM  |
| Ivermectin       | 45 D11  | C10 | 0.25 MCODE |
| Ivermectin       | 45 P02  | C10 | 0.25 MCODE |
| Ketorolac        | 40 S01  | N01 | 0.32 CL1   |
| Ketorolac        | 52 S01  | N01 | 0.30 CL1   |
| Leflunomide      | 62 L04  | N04 | 0.33 MCODE |
| Leflunomide      | 30 L04  | N04 | 0.17 CL1   |
| Lidocaine        | 25 C05  | N06 | 0.27 CL1   |
| Lidocaine        | 25 N01  | N06 | 0.27 CL1   |
| Lidocaine        | 42 D04  | N05 | 0.23 CL1   |
| Lidocaine        | 37 D04  | N05 | 0.23 CL1   |
| Lidocaine        | 41 C05  | N06 | 0.22 MCODE |
| Lidocaine        | 41 N01  | N06 | 0.22 MCODE |
| Mefloquine       | 3 P01   | D11 | 0.25 MCODE |
| Mefloquine       | 15 P01  | D11 | 0.22 GSOM  |
| Metformin        | 79 A10  | L01 | 0.50 GSOM  |
| Metformin        | 21 A10  | L01 | 0.33 MCODE |
| Methadone        | 64 N07  | A03 | 0.25 GSOM  |
| Methadone        | 408 N07 | A03 | 0.25 MCL   |
| Metoclopramide   | 64 A03  | N07 | 0.25 GSOM  |
| Metoclopramide   | 408 A03 | N07 | 0.25 MCL   |
| Metoclopramide   | 37 A03  | N05 | 0.23 CL1   |
| Metoclopramide   | 60 A03  | C03 | 0.20 CL1   |
| Metoclopramide   | 60 A03  | G04 | 0.20 CL1   |
| Metoclopramide   | 60 A03  | N05 | 0.20 CL1   |
| Metoclopramide   | 53 A03  | C03 | 0.17 CL1   |
| Metoclopramide   | 53 A03  | G04 | 0.17 CL1   |
| Metoclopramide   | 53 A03  | N05 | 0.17 CL1   |
| Mexiletine       | 39 C01  | N01 | 0.33 MCODE |
| Mexiletine       | 39 C01  | N07 | 0.33 MCODE |
| Mexiletine       | 56 C01  | N01 | 0.25 GSOM  |
| Mexiletine       | 23 C01  | N01 | 0.15 CL1   |
| Mexiletine       | 23 C01  | N07 | 0.15 CL1   |
| Milrinone        | 29 C01  | R03 | 0.25 GSOM  |

|                   |         |     |            |
|-------------------|---------|-----|------------|
| Milrinone         | 59 C01  | R03 | 0.20 CL1   |
| Moexipril         | 26 C09  | C07 | 0.50 CL1   |
| Moexipril         | 49 C09  | C07 | 0.33 CL1   |
| Morphine          | 56 N02  | C01 | 0.25 GSOM  |
| Morphine          | 56 N02  | N01 | 0.25 GSOM  |
| Morphine          | 23 N02  | C01 | 0.15 CL1   |
| Morphine          | 23 N02  | N01 | 0.15 CL1   |
| Mycophenolic Acid | 342 L04 | N03 | 0.50 MCL   |
| Mycophenolic Acid | 22 L04  | N03 | 0.27 GSOM  |
| Naloxone          | 56 V03  | C01 | 0.25 GSOM  |
| Naloxone          | 19 V03  | C01 | 0.17 CL1   |
| Nitric Oxide      | 38 R07  | B01 | 0.33 GSOM  |
| Nitric Oxide      | 38 R07  | B02 | 0.33 GSOM  |
| Nitric Oxide      | 13 R07  | B01 | 0.06 MCODE |
| Nitric Oxide      | 13 R07  | B02 | 0.06 MCODE |
| Olopatadine       | 87 S01  | G03 | 0.20 GSOM  |
| Olopatadine       | 12 S01  | G03 | 0.20 MCODE |
| Orlistat          | 26 A08  | C02 | 0.17 MCODE |
| Orlistat          | 26 A08  | M04 | 0.17 MCODE |
| Orlistat          | 60 A08  | C02 | 0.13 GSOM  |
| Orlistat          | 60 A08  | M04 | 0.13 GSOM  |
| Oxandrolone       | 86 A14  | N07 | 0.20 GSOM  |
| Oxandrolone       | 86 A14  | S01 | 0.20 GSOM  |
| Oxandrolone       | 13 A14  | N07 | 0.06 MCODE |
| Oxandrolone       | 13 A14  | S01 | 0.06 MCODE |
| Oxazepam          | 22 N05  | N03 | 0.27 GSOM  |
| Oxazepam          | 15 N05  | N03 | 0.21 CL1   |
| Paricalcitol      | 3 H05   | D11 | 0.25 MCODE |
| Paricalcitol      | 15 H05  | D11 | 0.22 GSOM  |
| Pentazocine       | 382 N02 | N01 | 0.27 MCL   |
| Pentazocine       | 63 N02  | N01 | 0.22 GSOM  |
| Phenoxybenzamine  | 86 C04  | N06 | 0.20 GSOM  |
| Phenoxybenzamine  | 86 C04  | N07 | 0.20 GSOM  |
| Phenoxybenzamine  | 86 C04  | S01 | 0.20 GSOM  |
| Phenoxybenzamine  | 8 C04   | N06 | 0.11 MCODE |
| Phenoxybenzamine  | 8 C04   | N07 | 0.11 MCODE |
| Phenoxybenzamine  | 8 C04   | S01 | 0.11 MCODE |
| Procainamide      | 20 C01  | N03 | 0.20 MCODE |
| Procainamide      | 20 C01  | N05 | 0.20 MCODE |
| Procainamide      | 30 C01  | N03 | 0.17 CL1   |
| Procainamide      | 30 C01  | N05 | 0.17 CL1   |
| Procyclidine      | 85 N04  | S01 | 0.33 GSOM  |
| Procyclidine      | 13 N04  | S01 | 0.06 MCODE |
| Ropinirole        | 52 N04  | L02 | 0.25 MCODE |
| Ropinirole        | 30 N04  | L02 | 0.17 CL1   |
| Sildenafil        | 60 G04  | A03 | 0.20 CL1   |
| Sildenafil        | 60 G04  | C03 | 0.20 CL1   |
| Sildenafil        | 60 G04  | N05 | 0.20 CL1   |
| Sildenafil        | 53 G04  | A03 | 0.17 CL1   |
| Sildenafil        | 53 G04  | C03 | 0.17 CL1   |

|              |         |     |            |
|--------------|---------|-----|------------|
| Sildenafil   | 53 G04  | N05 | 0.17 CL1   |
| Tetracycline | 13 A01  | L01 | 0.31 GSOM  |
| Tetracycline | 13 D06  | L01 | 0.31 GSOM  |
| Tetracycline | 13 J01  | L01 | 0.31 GSOM  |
| Tetracycline | 331 A01 | L01 | 0.14 MCL   |
| Tetracycline | 331 D06 | L01 | 0.14 MCL   |
| Tetracycline | 331 J01 | L01 | 0.14 MCL   |
| Tetracycline | 331 S01 | L01 | 0.14 MCL   |
| Tetracycline | 331 S02 | L01 | 0.14 MCL   |
| Tetracycline | 331 S03 | L01 | 0.14 MCL   |
| Tetracycline | 13 A01  | L01 | 0.06 MCODE |
| Tetracycline | 13 D06  | L01 | 0.06 MCODE |
| Tetracycline | 13 J01  | L01 | 0.06 MCODE |
| Tetracycline | 13 S01  | L01 | 0.06 MCODE |
| Tetracycline | 13 S02  | L01 | 0.06 MCODE |
| Tetracycline | 13 S03  | L01 | 0.06 MCODE |
| Tizanidine   | 372 M03 | N02 | 0.25 MCL   |
| Tizanidine   | 63 M03  | N02 | 0.25 MCODE |
