# Supplementary material for: A two-tiered unsupervised clustering approach for drug repositioning through heterogeneous data integration
Source: PubMed Central journal article supplement (PMC5896044; doi:10.1186/s12859-018-2123-4), 2018-04-11
Supplement: 12859_2018_2123_MOESM4_ESM.pdf [file 12859_2018_2123_MOESM4_ESM.pdf]

| Drug name       | Cluster ID | Old ATC name | New ATC name | Confidence | Algorithm |
|-----------------|------------|--------------|--------------|------------|-----------|
| Amlodipine      | 403        | C08          | C09          | 0.846154   | mcl       |
| Chlorthalidone  | 2          |              | C03          | 0.833333   | CL1       |
| Amantadine      | 51         | N04          | N05          | 0.8        | CL1       |
| Thioridazine    | 51         |              | N05          | 0.8        | CL1       |
| Hydroxyzine     | 30         | N05          | C09          | 0.75       | mcode     |
| Cyproheptadin   | 46         | R06          | N06          | 0.7        | CL1       |
| Amlodipine      | 11         | C08          | C09          | 0.695652   | CL1       |
| Carvedilol      | 11         | C07          | C09          | 0.695652   | CL1       |
| Cetirizine      | 11         | R06          | C09          | 0.695652   | CL1       |
| Acitretin       | 414        | D05          | D10          | 0.666667   | mcl       |
| Brinzolamide    | 48         | S01          | L02          | 0.666667   | mcode     |
| Orphenadrine    | 392        |              | R06          | 0.642857   | mcl       |
| Clonidine       | 56         | C02          | N05          | 0.615385   | CL1       |
| Clonidine       | 56         | N02          | N05          | 0.615385   | CL1       |
| Clonidine       | 56         | S01          | N05          | 0.615385   | CL1       |
| Thioridazine    | 56         |              | N05          | 0.615385   | CL1       |
| Dofetilide      | 399        | C01          | L02          | 0.6        | mcl       |
| Cyproheptadin   | 35         | R06          | N06          | 0.590909   | CL1       |
| Guanfacine      | 35         | C02          | N06          | 0.590909   | CL1       |
| Dipivefrin      | 44         | S01          | N05          | 0.571429   | CL1       |
| Indomethacin    | 7          |              | M01          | 0.571429   | mcode     |
| Nicardipine     | 57         | C08          | N06          | 0.571429   | CL1       |
| Cyproheptadin   | 4          | R06          | N06          | 0.541667   | CL1       |
| Methadone       | 4          | N07          | N06          | 0.541667   | CL1       |
| Arsenic Trioxid | 4          | L01          | P01          | 0.5        | mcode     |
| Atropine        | 48         | A03          | N04          | 0.5        | CL1       |
| Atropine        | 48         | S01          | N04          | 0.5        | CL1       |
| Atropine        | 393        | A03          | N04          | 0.5        | mcl       |
| Dacarbazine     | 79         | L01          | A10          | 0.5        | gsom      |
| Hexachlorophe   | 350        | D08          | D05          | 0.5        | mcl       |
| Isocarboxazid   | 50         | N06          | N05          | 0.5        | mcode     |
| Levetiracetam   | 346        | N03          | L01          | 0.5        | mcl       |
| Lithium         | 6          | N05          | N06          | 0.5        | gsom      |
| Mercaptopurin   | 4          | L01          | P01          | 0.5        | mcode     |
| Metformin       | 79         | A10          | L01          | 0.5        | gsom      |
| Moexipril       | 26         | C09          | C07          | 0.5        | CL1       |
| Mycophenolic    | 342        | L04          | N03          | 0.5        | mcl       |
| Phenytoin       | 66         | N03          | C01          | 0.5        | gsom      |
| Tazarotene      | 350        | D05          | D08          | 0.5        | mcl       |
| Tolterodine     | 59         | G04          | C01          | 0.5        | gsom      |
| Topotecan       | 346        | L01          | N03          | 0.5        | mcl       |
| Zonisamide      | 342        | N03          | L04          | 0.5        | mcl       |
| Aspirin         | 6          |              | M01          | 0.470588   | CL1       |
| Indomethacin    | 6          |              | M01          | 0.470588   | CL1       |
| Aripiprazole    | 45         | N05          | N06          | 0.466667   | CL1       |
| Ofloxacin       | 45         | S01          | N06          | 0.466667   | CL1       |
| Atropine        | 20         | A03          | N04          | 0.461538   | gsom      |
| Atropine        | 20         | S01          | N04          | 0.461538   | gsom      |
| Indomethacin    | 380        |              | M01          | 0.457143   | mcl       |

|               |     |     |     |          |       |
|---------------|-----|-----|-----|----------|-------|
| Epinephrine   | 17  | A01 | C07 | 0.454545 | CL1   |
| Epinephrine   | 17  | B02 | C07 | 0.454545 | CL1   |
| Epinephrine   | 17  | R01 | C07 | 0.454545 | CL1   |
| Epinephrine   | 17  | R03 | C07 | 0.454545 | CL1   |
| Epinephrine   | 17  | S01 | C07 | 0.454545 | CL1   |
| Carbamazepine | 46  | N03 | N05 | 0.428571 | gsom  |
| Carbamazepine | 46  | N03 | N06 | 0.428571 | gsom  |
| Orphenadrine  | 36  |     | R06 | 0.428571 | CL1   |
| Sertraline    | 38  | N06 | A10 | 0.428571 | mcode |
| Droperidol    | 28  | N05 | N01 | 0.416667 | gsom  |
| Fulvestrant   | 23  | L02 | A10 | 0.416667 | gsom  |
| Fulvestrant   | 13  | L02 | A10 | 0.416667 | CL1   |
| Bicalutamide  | 10  | L02 | C10 | 0.411765 | CL1   |
| Aripiprazole  | 31  | N05 | N06 | 0.4      | CL1   |
| Bimatoprost   | 55  | S01 | L02 | 0.4      | mcode |
| Cefdinir      | 42  | J01 | M03 | 0.4      | gsom  |
| Chlorzoxazone | 88  | M03 | P03 | 0.4      | gsom  |
| Dantrolene    | 47  | M03 | B01 | 0.4      | mcode |
| Digoxin       | 2   | C01 | A02 | 0.4      | mcode |
| Dolasetron    | 2   | A04 | A02 | 0.4      | mcode |
| Donepezil     | 2   | N06 | A02 | 0.4      | mcode |
| Droperidol    | 359 | N05 | N03 | 0.4      | mcl   |
| Entacapone    | 42  | N04 | M03 | 0.4      | gsom  |
| Hydroxyurea   | 2   |     | A02 | 0.4      | mcode |
| Lindane       | 34  | P03 | C08 | 0.4      | mcode |
| Mephénytoin   | 18  | N03 | P01 | 0.4      | gsom  |
| Methazolamide | 34  | S01 | C08 | 0.4      | mcode |
| Metipranolol  | 42  | S01 | C07 | 0.4      | mcode |
| Procaine      | 31  | C05 | N06 | 0.4      | CL1   |
| Procaine      | 61  | N01 | N06 | 0.4      | mcode |
| Spirolactone  | 47  | C03 | B01 | 0.4      | mcode |
| Tadalafil     | 49  | G04 | C09 | 0.4      | mcode |
| Albendazole   | 14  | P02 | A02 | 0.333333 | mcode |
| Albendazole   | 14  | P02 | D01 | 0.333333 | mcode |
| Amifostine    | 11  | V03 | H02 | 0.333333 | mcode |
| Amifostine    | 11  | V03 | S01 | 0.333333 | mcode |
| Amiloride     | 32  | C03 | C09 | 0.333333 | CL1   |
| Amiloride     | 53  | C03 | C09 | 0.333333 | mcode |
| Amiloride     | 53  | C03 | N03 | 0.333333 | mcode |
| Amiodarone    | 49  | C01 | C07 | 0.333333 | CL1   |
| Aspirin       | 14  |     | A02 | 0.333333 | mcode |
| Aspirin       | 14  |     | D01 | 0.333333 | mcode |
| Aspirin       | 14  |     | P02 | 0.333333 | mcode |
| Buspirone     | 386 | N05 | N04 | 0.333333 | mcl   |
| Buspirone     | 386 | N05 | N06 | 0.333333 | mcl   |
| Captopril     | 53  | C09 | C03 | 0.333333 | mcode |
| Captopril     | 53  | C09 | N03 | 0.333333 | mcode |
| Desloratadine | 50  | R06 | R03 | 0.333333 | CL1   |
| Dexrazoxane   | 12  | V03 | L01 | 0.333333 | CL1   |
| Eprosartan    | 62  | C09 | L04 | 0.333333 | mcode |

|                |     |     |     |          |       |
|----------------|-----|-----|-----|----------|-------|
| Eprosartan     | 62  | C09 | N04 | 0.333333 | mcode |
| Fenoprofen     | 32  | M01 | C09 | 0.333333 | CL1   |
| Fludrocortison | 11  | H02 | S01 | 0.333333 | mcode |
| Fludrocortison | 11  | H02 | V03 | 0.333333 | mcode |
| Fulvestrant    | 54  | L02 | A02 | 0.333333 | mcode |
| Fulvestrant    | 54  | L02 | N03 | 0.333333 | mcode |
| Glycopyrrolate | 21  |     | A10 | 0.333333 | mcode |
| Glycopyrrolate | 21  |     | D11 | 0.333333 | mcode |
| Glycopyrrolate | 21  |     | L01 | 0.333333 | mcode |
| Lamotrigine    | 54  | N03 | A02 | 0.333333 | mcode |
| Lamotrigine    | 54  | N03 | L02 | 0.333333 | mcode |
| Leflunomide    | 62  | L04 | C09 | 0.333333 | mcode |
| Leflunomide    | 62  | L04 | N04 | 0.333333 | mcode |
| Levobunolol    | 51  | S01 | C07 | 0.333333 | mcode |
| Levobunolol    | 51  | S01 | R06 | 0.333333 | mcode |
| Loratadine     | 51  | R06 | C07 | 0.333333 | mcode |
| Loratadine     | 51  | R06 | S01 | 0.333333 | mcode |
| Mebendazole    | 16  | P02 | L02 | 0.333333 | mcode |
| Mebendazole    | 16  | P02 | N01 | 0.333333 | mcode |
| Metformin      | 21  | A10 | D11 | 0.333333 | mcode |
| Metformin      | 21  | A10 | L01 | 0.333333 | mcode |
| Mexiletine     | 39  | C01 | N01 | 0.333333 | mcode |
| Mexiletine     | 39  | C01 | N07 | 0.333333 | mcode |
| Moexipril      | 49  | C09 | C01 | 0.333333 | CL1   |
| Moexipril      | 49  | C09 | C07 | 0.333333 | CL1   |
| Naltrexone     | 39  | N07 | C01 | 0.333333 | mcode |
| Naltrexone     | 39  | N07 | N01 | 0.333333 | mcode |
| Nilutamide     | 16  | L02 | N01 | 0.333333 | mcode |
| Nilutamide     | 16  | L02 | P02 | 0.333333 | mcode |
| Nizatidine     | 54  | A02 | L02 | 0.333333 | mcode |
| Nizatidine     | 54  | A02 | N03 | 0.333333 | mcode |
| Norfloxacin    | 32  | J01 | C09 | 0.333333 | CL1   |
| Norfloxacin    | 32  | S01 | C09 | 0.333333 | CL1   |
| Penbutolol     | 51  | C07 | R06 | 0.333333 | mcode |
| Penbutolol     | 51  | C07 | S01 | 0.333333 | mcode |
| Pimecrolimus   | 21  | D11 | A10 | 0.333333 | mcode |
| Pimecrolimus   | 21  | D11 | L01 | 0.333333 | mcode |
| Pramipexole    | 386 | N04 | N05 | 0.333333 | mcl   |
| Pramipexole    | 386 | N04 | N06 | 0.333333 | mcl   |
| Remifentanil   | 16  | N01 | L02 | 0.333333 | mcode |
| Remifentanil   | 16  | N01 | P02 | 0.333333 | mcode |
| Selegiline     | 62  | N04 | C09 | 0.333333 | mcode |
| Selegiline     | 62  | N04 | L04 | 0.333333 | mcode |
| Sufentanil     | 39  | N01 | C01 | 0.333333 | mcode |
| Sufentanil     | 39  | N01 | N07 | 0.333333 | mcode |
| Trazodone      | 386 | N06 | N04 | 0.333333 | mcl   |
| Trazodone      | 386 | N06 | N05 | 0.333333 | mcl   |
| Tropicamide    | 11  | S01 | H02 | 0.333333 | mcode |
| Tropicamide    | 11  | S01 | V03 | 0.333333 | mcode |
| Valproic Acid  | 53  | N03 | C03 | 0.333333 | mcode |

|                |    |     |     |          |       |
|----------------|----|-----|-----|----------|-------|
| Valproic Acid  | 53 | N03 | C09 | 0.333333 | mcode |
| Acarbose       | 17 | A10 | L01 | 0.333333 | gsom  |
| Acarbose       | 17 | A10 | M04 | 0.333333 | gsom  |
| Argatroban     | 38 | B01 | B02 | 0.333333 | gsom  |
| Argatroban     | 38 | B01 | R07 | 0.333333 | gsom  |
| Capecitabine   | 17 | L01 | A10 | 0.333333 | gsom  |
| Capecitabine   | 17 | L01 | M04 | 0.333333 | gsom  |
| Carvedilol     | 34 | C07 | N03 | 0.333333 | gsom  |
| Carvedilol     | 34 | C07 | N06 | 0.333333 | gsom  |
| Cefixime       | 80 | J01 | B01 | 0.333333 | gsom  |
| Cefixime       | 80 | J01 | R03 | 0.333333 | gsom  |
| Dexrazoxane    | 24 | V03 | L01 | 0.333333 | gsom  |
| Didanosine     | 92 | J05 | B01 | 0.333333 | gsom  |
| Didanosine     | 92 | J05 | L01 | 0.333333 | gsom  |
| Emedastine     | 58 | S01 | N07 | 0.333333 | gsom  |
| Galantamine    | 34 | N06 | C07 | 0.333333 | gsom  |
| Galantamine    | 34 | N06 | N03 | 0.333333 | gsom  |
| Gefitinib      | 92 | L01 | B01 | 0.333333 | gsom  |
| Gefitinib      | 92 | L01 | J05 | 0.333333 | gsom  |
| Imiquimod      | 58 | D06 | N07 | 0.333333 | gsom  |
| Imiquimod      | 58 | D06 | S01 | 0.333333 | gsom  |
| Levocabastine  | 85 | R01 | N04 | 0.333333 | gsom  |
| Levocabastine  | 85 | S01 | N04 | 0.333333 | gsom  |
| Nitric Oxide   | 38 | R07 | B01 | 0.333333 | gsom  |
| Nitric Oxide   | 38 | R07 | B02 | 0.333333 | gsom  |
| Procyclidine   | 85 | N04 | R01 | 0.333333 | gsom  |
| Procyclidine   | 85 | N04 | S01 | 0.333333 | gsom  |
| Sulfinpyrazone | 17 | M04 | A10 | 0.333333 | gsom  |
| Sulfinpyrazone | 17 | M04 | L01 | 0.333333 | gsom  |
| Ticlopidine    | 92 | B01 | J05 | 0.333333 | gsom  |
| Ticlopidine    | 92 | B01 | L01 | 0.333333 | gsom  |
| Tranexamic Aci | 38 | B02 | B01 | 0.333333 | gsom  |
| Tranexamic Aci | 38 | B02 | R07 | 0.333333 | gsom  |
| Valproic Acid  | 34 | N03 | C07 | 0.333333 | gsom  |
| Valproic Acid  | 34 | N03 | N06 | 0.333333 | gsom  |
| Warfarin       | 80 | B01 | J01 | 0.333333 | gsom  |
| Warfarin       | 80 | B01 | R03 | 0.333333 | gsom  |
| Zafirlukast    | 80 | R03 | B01 | 0.333333 | gsom  |
| Zafirlukast    | 80 | R03 | J01 | 0.333333 | gsom  |
| Dopamine       | 40 | C01 | N01 | 0.323529 | CL1   |
| Droperidol     | 40 | N05 | N01 | 0.323529 | CL1   |
| Ketorolac      | 40 | S01 | N01 | 0.323529 | CL1   |
| Leflunomide    | 13 | L04 | L01 | 0.307692 | gsom  |
| Tetracycline   | 13 | A01 | L01 | 0.307692 | gsom  |
| Tetracycline   | 13 | D06 | L01 | 0.307692 | gsom  |
| Tetracycline   | 13 | J01 | L01 | 0.307692 | gsom  |
| Brimonidine    | 54 | S01 | C02 | 0.3      | CL1   |
| Aripiprazole   | 52 | N05 | N01 | 0.296296 | CL1   |
| Dexmedetomic   | 52 | N05 | N01 | 0.296296 | CL1   |
| Ketorolac      | 52 | M01 | N01 | 0.296296 | CL1   |

|                |     |     |     |          |       |
|----------------|-----|-----|-----|----------|-------|
| Ketorolac      | 52  | S01 | N01 | 0.296296 | CL1   |
| Azelaic Acid   | 22  | D10 | N03 | 0.272727 | gsom  |
| Famotidine     | 11  | A02 | C10 | 0.272727 | gsom  |
| Hexachlorophe  | 11  | D08 | C10 | 0.272727 | gsom  |
| Ivermectin     | 11  | D11 | C10 | 0.272727 | gsom  |
| Ivermectin     | 11  | P02 | C10 | 0.272727 | gsom  |
| Mycophenolic , | 22  | L04 | N03 | 0.272727 | gsom  |
| Oxazepam       | 22  | N05 | N03 | 0.272727 | gsom  |
| Atorvastatin   | 3   | C10 | N05 | 0.272727 | CL1   |
| Bromocriptine  | 55  | G02 | N02 | 0.272727 | CL1   |
| Bromocriptine  | 55  | N04 | N02 | 0.272727 | CL1   |
| Bromocriptine  | 61  | G02 | N05 | 0.272727 | CL1   |
| Bromocriptine  | 61  | N04 | N05 | 0.272727 | CL1   |
| Capecitabine   | 3   | L01 | N05 | 0.272727 | CL1   |
| Carbamazepine  | 382 | N03 | N01 | 0.272727 | mcl   |
| Clonidine      | 61  | C02 | N05 | 0.272727 | CL1   |
| Clonidine      | 61  | S01 | N05 | 0.272727 | CL1   |
| Dihydroergotar | 61  | N02 | N05 | 0.272727 | CL1   |
| Ezetimibe      | 373 | C10 | A02 | 0.272727 | mcl   |
| Fenofibrate    | 373 | C10 | A02 | 0.272727 | mcl   |
| Fluvastatin    | 3   | C10 | N05 | 0.272727 | CL1   |
| Gemfibrozil    | 373 | C10 | A02 | 0.272727 | mcl   |
| Isradipine     | 3   | C08 | N05 | 0.272727 | CL1   |
| Mycophenolic , | 3   | L04 | N05 | 0.272727 | CL1   |
| Pentazocine    | 382 | N02 | N01 | 0.272727 | mcl   |
| Bicalutamide   | 25  | L02 | N06 | 0.269231 | CL1   |
| Carbamazepine  | 25  | N03 | N06 | 0.269231 | CL1   |
| Finasteride    | 25  | G04 | N06 | 0.269231 | CL1   |
| Flutamide      | 25  | L02 | N06 | 0.269231 | CL1   |
| Lidocaine      | 25  | C05 | N06 | 0.269231 | CL1   |
| Lidocaine      | 25  | D04 | N06 | 0.269231 | CL1   |
| Lidocaine      | 25  | N01 | N06 | 0.269231 | CL1   |
| Indapamide     | 1   | C03 | L01 | 0.266667 | mcode |
| Minoxidil      | 1   | D11 | L01 | 0.266667 | mcode |
| Nicotine       | 1   | N07 | L01 | 0.266667 | mcode |
| Adenosine      | 17  | C01 | R06 | 0.25     | mcode |
| Amantadine     | 408 | N04 | A03 | 0.25     | mcl   |
| Amantadine     | 408 | N04 | A04 | 0.25     | mcl   |
| Amantadine     | 408 | N04 | N07 | 0.25     | mcl   |
| Aminoglutethir | 52  | L02 | B03 | 0.25     | mcode |
| Aminoglutethir | 52  | L02 | N04 | 0.25     | mcode |
| Aminoglutethir | 52  | L02 | V03 | 0.25     | mcode |
| Amiodarone     | 56  | C01 | N01 | 0.25     | gsom  |
| Atovaquone     | 24  | P01 | C01 | 0.25     | mcode |
| Atovaquone     | 24  | P01 | C08 | 0.25     | mcode |
| Atovaquone     | 24  | P01 | L01 | 0.25     | mcode |
| Atropine       | 56  | A03 | N06 | 0.25     | mcode |
| Atropine       | 56  | A03 | R06 | 0.25     | mcode |
| Atropine       | 56  | S01 | N06 | 0.25     | mcode |
| Atropine       | 56  | S01 | R06 | 0.25     | mcode |

|                |     |     |     |      |       |
|----------------|-----|-----|-----|------|-------|
| Azelastine     | 33  | R01 | A10 | 0.25 | mcode |
| Azelastine     | 33  | R06 | A10 | 0.25 | mcode |
| Azelastine     | 33  | S01 | A10 | 0.25 | mcode |
| Baclofen       | 28  | M03 | C03 | 0.25 | mcode |
| Baclofen       | 28  | M03 | J01 | 0.25 | mcode |
| Baclofen       | 28  | M03 | N02 | 0.25 | mcode |
| Carteolol      | 59  | C07 | A10 | 0.25 | mcode |
| Carteolol      | 59  | C07 | B01 | 0.25 | mcode |
| Carteolol      | 59  | S01 | A10 | 0.25 | mcode |
| Carteolol      | 59  | S01 | B01 | 0.25 | mcode |
| Cefixime       | 28  | J01 | C03 | 0.25 | mcode |
| Cefixime       | 28  | J01 | M03 | 0.25 | mcode |
| Cefixime       | 28  | J01 | N02 | 0.25 | mcode |
| Clonidine      | 21  | C02 | C07 | 0.25 | gsom  |
| Clonidine      | 21  | N02 | C07 | 0.25 | gsom  |
| Clonidine      | 372 | C02 | M03 | 0.25 | mcl   |
| Clonidine      | 372 | N02 | M03 | 0.25 | mcl   |
| Clonidine      | 372 | S01 | M03 | 0.25 | mcl   |
| Cyproheptadin  | 56  | R06 | A03 | 0.25 | mcode |
| Cyproheptadin  | 56  | R06 | N06 | 0.25 | mcode |
| Cyproheptadin  | 56  | R06 | S01 | 0.25 | mcode |
| Daunorubicin   | 24  | L01 | C01 | 0.25 | mcode |
| Daunorubicin   | 24  | L01 | C08 | 0.25 | mcode |
| Daunorubicin   | 24  | L01 | P01 | 0.25 | mcode |
| Dexmedetomic   | 366 | N05 | C05 | 0.25 | mcl   |
| Dexmedetomic   | 366 | N05 | N01 | 0.25 | mcl   |
| Dexmedetomic   | 366 | N05 | S01 | 0.25 | mcl   |
| Dihydroergotar | 63  | N02 | D11 | 0.25 | mcode |
| Dihydroergotar | 63  | N02 | G04 | 0.25 | mcode |
| Dihydroergotar | 63  | N02 | M03 | 0.25 | mcode |
| Disopyramide   | 21  | C01 | C07 | 0.25 | gsom  |
| Dopamine       | 29  | C01 | R03 | 0.25 | gsom  |
| Doxazosin      | 21  | C02 | C07 | 0.25 | gsom  |
| Eplerenone     | 28  | C03 | J01 | 0.25 | mcode |
| Eplerenone     | 28  | C03 | M03 | 0.25 | mcode |
| Eplerenone     | 28  | C03 | N02 | 0.25 | mcode |
| Ergotamine     | 29  | N02 | C01 | 0.25 | gsom  |
| Ergotamine     | 29  | N02 | R03 | 0.25 | gsom  |
| Ethionamide    | 39  | J04 | C01 | 0.25 | CL1   |
| Ethionamide    | 45  | J04 | C10 | 0.25 | mcode |
| Ethionamide    | 45  | J04 | D11 | 0.25 | mcode |
| Ethionamide    | 45  | J04 | P02 | 0.25 | mcode |
| Ezetimibe      | 45  | C10 | D11 | 0.25 | mcode |
| Ezetimibe      | 45  | C10 | J04 | 0.25 | mcode |
| Ezetimibe      | 45  | C10 | P02 | 0.25 | mcode |
| Finasteride    | 63  | D11 | M03 | 0.25 | mcode |
| Finasteride    | 63  | D11 | N02 | 0.25 | mcode |
| Finasteride    | 63  | G04 | M03 | 0.25 | mcode |
| Finasteride    | 63  | G04 | N02 | 0.25 | mcode |
| Glimepiride    | 33  | A10 | R01 | 0.25 | mcode |

|               |     |     |     |      |       |
|---------------|-----|-----|-----|------|-------|
| Glimepiride   | 33  | A10 | R06 | 0.25 | mcode |
| Glimepiride   | 33  | A10 | S01 | 0.25 | mcode |
| Hydroxocobala | 52  | B03 | L02 | 0.25 | mcode |
| Hydroxocobala | 52  | B03 | N04 | 0.25 | mcode |
| Hydroxocobala | 52  | V03 | L02 | 0.25 | mcode |
| Hydroxocobala | 52  | V03 | N04 | 0.25 | mcode |
| Iloprost      | 59  | B01 | A10 | 0.25 | mcode |
| Iloprost      | 59  | B01 | C07 | 0.25 | mcode |
| Iloprost      | 59  | B01 | S01 | 0.25 | mcode |
| Imatinib      | 39  | L01 | C01 | 0.25 | CL1   |
| Imatinib      | 39  | L01 | J04 | 0.25 | CL1   |
| Isoflurane    | 29  | N01 | C01 | 0.25 | gsom  |
| Isoflurane    | 29  | N01 | R03 | 0.25 | gsom  |
| Isoniazid     | 39  | J04 | C01 | 0.25 | CL1   |
| Ivermectin    | 45  | D11 | C10 | 0.25 | mcode |
| Ivermectin    | 45  | D11 | J04 | 0.25 | mcode |
| Ivermectin    | 45  | P02 | C10 | 0.25 | mcode |
| Ivermectin    | 45  | P02 | J04 | 0.25 | mcode |
| Labetalol     | 47  | C07 | M04 | 0.25 | CL1   |
| Labetalol     | 47  | C07 | N01 | 0.25 | CL1   |
| Labetalol     | 47  | C07 | N05 | 0.25 | CL1   |
| Losartan      | 39  | C09 | C01 | 0.25 | CL1   |
| Losartan      | 39  | C09 | J04 | 0.25 | CL1   |
| Mefloquine    | 3   | P01 | D11 | 0.25 | mcode |
| Mefloquine    | 3   | P01 | H05 | 0.25 | mcode |
| Mefloquine    | 3   | P01 | L04 | 0.25 | mcode |
| Megestrol     | 54  | G03 | A07 | 0.25 | gsom  |
| Megestrol     | 54  | G03 | H02 | 0.25 | gsom  |
| Megestrol     | 54  | L02 | A07 | 0.25 | gsom  |
| Megestrol     | 54  | L02 | H02 | 0.25 | gsom  |
| Methadone     | 64  | N07 | A03 | 0.25 | gsom  |
| Methadone     | 64  | N07 | D04 | 0.25 | gsom  |
| Methadone     | 64  | N07 | R06 | 0.25 | gsom  |
| Methadone     | 408 | N07 | A03 | 0.25 | mcl   |
| Methadone     | 408 | N07 | A04 | 0.25 | mcl   |
| Methadone     | 408 | N07 | N04 | 0.25 | mcl   |
| Metoclopramic | 64  | A03 | D04 | 0.25 | gsom  |
| Metoclopramic | 64  | A03 | N07 | 0.25 | gsom  |
| Metoclopramic | 64  | A03 | R06 | 0.25 | gsom  |
| Metoclopramic | 408 | A03 | A04 | 0.25 | mcl   |
| Metoclopramic | 408 | A03 | N04 | 0.25 | mcl   |
| Metoclopramic | 408 | A03 | N07 | 0.25 | mcl   |
| Mexiletine    | 56  | C01 | N01 | 0.25 | gsom  |
| Midodrine     | 24  | C01 | C08 | 0.25 | mcode |
| Midodrine     | 24  | C01 | L01 | 0.25 | mcode |
| Midodrine     | 24  | C01 | P01 | 0.25 | mcode |
| Milrinone     | 29  | C01 | R03 | 0.25 | gsom  |
| Morphine      | 56  | N02 | C01 | 0.25 | gsom  |
| Morphine      | 56  | N02 | N01 | 0.25 | gsom  |
| Naloxone      | 56  | V03 | C01 | 0.25 | gsom  |

|                |     |     |     |      |       |
|----------------|-----|-----|-----|------|-------|
| Naloxone       | 56  | V03 | N01 | 0.25 | gsom  |
| Nimodipine     | 24  | C08 | C01 | 0.25 | mcode |
| Nimodipine     | 24  | C08 | L01 | 0.25 | mcode |
| Nimodipine     | 24  | C08 | P01 | 0.25 | mcode |
| Ondansetron    | 408 | A04 | A03 | 0.25 | mcl   |
| Ondansetron    | 408 | A04 | N04 | 0.25 | mcl   |
| Ondansetron    | 408 | A04 | N07 | 0.25 | mcl   |
| Orphenadrine   | 33  |     | A10 | 0.25 | mcode |
| Orphenadrine   | 33  |     | R01 | 0.25 | mcode |
| Orphenadrine   | 33  |     | R06 | 0.25 | mcode |
| Orphenadrine   | 33  |     | S01 | 0.25 | mcode |
| Paricalcitol   | 3   | H05 | D11 | 0.25 | mcode |
| Paricalcitol   | 3   | H05 | L04 | 0.25 | mcode |
| Paricalcitol   | 3   | H05 | P01 | 0.25 | mcode |
| Phenelzine     | 56  | N06 | A03 | 0.25 | mcode |
| Phenelzine     | 56  | N06 | R06 | 0.25 | mcode |
| Phenelzine     | 56  | N06 | S01 | 0.25 | mcode |
| Pioglitazone   | 59  | A10 | B01 | 0.25 | mcode |
| Pioglitazone   | 59  | A10 | C07 | 0.25 | mcode |
| Pioglitazone   | 59  | A10 | S01 | 0.25 | mcode |
| Prednisone     | 54  | A07 | G03 | 0.25 | gsom  |
| Prednisone     | 54  | A07 | L02 | 0.25 | gsom  |
| Prednisone     | 54  | H02 | G03 | 0.25 | gsom  |
| Prednisone     | 54  | H02 | L02 | 0.25 | gsom  |
| Procaine       | 366 | C05 | N05 | 0.25 | mcl   |
| Procaine       | 366 | N01 | N05 | 0.25 | mcl   |
| Procaine       | 366 | S01 | N05 | 0.25 | mcl   |
| Promethazine   | 64  | D04 | A03 | 0.25 | gsom  |
| Promethazine   | 64  | D04 | N07 | 0.25 | gsom  |
| Promethazine   | 64  | R06 | A03 | 0.25 | gsom  |
| Promethazine   | 64  | R06 | N07 | 0.25 | gsom  |
| Quetiapine     | 47  | N05 | C07 | 0.25 | CL1   |
| Quetiapine     | 47  | N05 | M04 | 0.25 | CL1   |
| Quetiapine     | 47  | N05 | N01 | 0.25 | CL1   |
| Ropinirole     | 52  | N04 | B03 | 0.25 | mcode |
| Ropinirole     | 52  | N04 | L02 | 0.25 | mcode |
| Ropinirole     | 52  | N04 | V03 | 0.25 | mcode |
| Sufentanil     | 47  | N01 | C07 | 0.25 | CL1   |
| Sufentanil     | 47  | N01 | M04 | 0.25 | CL1   |
| Sufentanil     | 47  | N01 | N05 | 0.25 | CL1   |
| Sulfinpyrazone | 47  | M04 | C07 | 0.25 | CL1   |
| Sulfinpyrazone | 47  | M04 | N01 | 0.25 | CL1   |
| Sulfinpyrazone | 47  | M04 | N05 | 0.25 | CL1   |
| Sumatriptan    | 28  | N02 | C03 | 0.25 | mcode |
| Sumatriptan    | 28  | N02 | J01 | 0.25 | mcode |
| Sumatriptan    | 28  | N02 | M03 | 0.25 | mcode |
| Tacrolimus     | 3   | D11 | H05 | 0.25 | mcode |
| Tacrolimus     | 3   | D11 | P01 | 0.25 | mcode |
| Tacrolimus     | 3   | L04 | H05 | 0.25 | mcode |
| Tacrolimus     | 3   | L04 | P01 | 0.25 | mcode |



|                |     |     |     |          |       |
|----------------|-----|-----|-----|----------|-------|
| Tizanidine     | 372 | M03 | C02 | 0.25     | mcl   |
| Tizanidine     | 372 | M03 | N02 | 0.25     | mcl   |
| Tizanidine     | 372 | M03 | S01 | 0.25     | mcl   |
| Tizanidine     | 63  | M03 | D11 | 0.25     | mcode |
| Tizanidine     | 63  | M03 | G04 | 0.25     | mcode |
| Tizanidine     | 63  | M03 | N02 | 0.25     | mcode |
| Ciclesonide    | 33  | R01 | D07 | 0.237288 | CL1   |
| Ciclesonide    | 412 | R01 | D07 | 0.237288 | mcl   |
| Carbamazepine  | 42  | N03 | N05 | 0.230769 | CL1   |
| Ciprofloxacin  | 29  | S01 | M01 | 0.230769 | mcode |
| Ciprofloxacin  | 29  | S02 | M01 | 0.230769 | mcode |
| Ciprofloxacin  | 29  | S03 | M01 | 0.230769 | mcode |
| Desipramine    | 42  | N06 | N05 | 0.230769 | CL1   |
| Dihydroergotar | 42  | N02 | N05 | 0.230769 | CL1   |
| Finasteride    | 42  | G04 | N05 | 0.230769 | CL1   |
| Lidocaine      | 42  | C01 | N05 | 0.230769 | CL1   |
| Lidocaine      | 42  | C05 | N05 | 0.230769 | CL1   |
| Lidocaine      | 42  | D04 | N05 | 0.230769 | CL1   |
| Amantadine     | 37  | N04 | N05 | 0.227273 | CL1   |
| Ketamine       | 37  | N01 | N05 | 0.227273 | CL1   |
| Lidocaine      | 37  | D04 | N05 | 0.227273 | CL1   |
| Lidocaine      | 37  | N01 | N05 | 0.227273 | CL1   |
| Lidocaine      | 37  | S01 | N05 | 0.227273 | CL1   |
| Lidocaine      | 37  | S02 | N05 | 0.227273 | CL1   |
| Methadone      | 37  | N07 | N05 | 0.227273 | CL1   |
| Metoclopramic  | 37  | A03 | N05 | 0.227273 | CL1   |
| Pentazocine    | 37  | N02 | N05 | 0.227273 | CL1   |
| Acarbose       | 1   | A10 | C03 | 0.222222 | CL1   |
| Aspirin        | 26  |     | D07 | 0.222222 | gsom  |
| Aspirin        | 26  |     | R01 | 0.222222 | gsom  |
| Aspirin        | 26  |     | R03 | 0.222222 | gsom  |
| Cefazolin      | 8   | J01 | L01 | 0.222222 | CL1   |
| Ciprofloxacin  | 8   | J01 | L01 | 0.222222 | CL1   |
| Ciprofloxacin  | 8   | S01 | L01 | 0.222222 | CL1   |
| Ciprofloxacin  | 8   | S02 | L01 | 0.222222 | CL1   |
| Ethotoin       | 1   | N03 | C03 | 0.222222 | CL1   |
| Ketoconazole   | 1   | D01 | C03 | 0.222222 | CL1   |
| Ketoconazole   | 1   | G01 | C03 | 0.222222 | CL1   |
| Ketoconazole   | 1   | J02 | C03 | 0.222222 | CL1   |
| Lidocaine      | 41  | C01 | N06 | 0.222222 | mcode |
| Lidocaine      | 41  | C05 | N06 | 0.222222 | mcode |
| Lidocaine      | 41  | N01 | N06 | 0.222222 | mcode |
| Lidocaine      | 41  | R02 | N06 | 0.222222 | mcode |
| Lidocaine      | 41  | S01 | N06 | 0.222222 | mcode |
| Loratadine     | 1   | R06 | C03 | 0.222222 | CL1   |
| Penbutolol     | 1   | C07 | C03 | 0.222222 | CL1   |
| Apraclonidine  | 61  | S01 | V03 | 0.222222 | gsom  |
| Aspirin        | 26  |     | D07 | 0.222222 | gsom  |
| Aspirin        | 26  |     | R01 | 0.222222 | gsom  |
| Aspirin        | 26  |     | R03 | 0.222222 | gsom  |

|                |    |     |     |          |       |
|----------------|----|-----|-----|----------|-------|
| Atomoxetine    | 61 | N06 | V03 | 0.222222 | gsom  |
| Bosentan       | 15 | C02 | D11 | 0.222222 | gsom  |
| Flunisolide    | 26 | R01 | D07 | 0.222222 | gsom  |
| Fluorometholo  | 26 | D07 | R01 | 0.222222 | gsom  |
| Fluorometholo  | 26 | D07 | R03 | 0.222222 | gsom  |
| Mefloquine     | 15 | P01 | D11 | 0.222222 | gsom  |
| Midodrine      | 61 | C01 | V03 | 0.222222 | gsom  |
| Nalbuphine     | 61 | N02 | V03 | 0.222222 | gsom  |
| Paricalcitol   | 15 | H05 | D11 | 0.222222 | gsom  |
| Pentazocine    | 63 | N02 | N01 | 0.222222 | gsom  |
| Ropivacaine    | 15 | N01 | D11 | 0.222222 | gsom  |
| Adapalene      | 15 | D10 | N03 | 0.214286 | CL1   |
| Modafinil      | 15 | N06 | N03 | 0.214286 | CL1   |
| Oxazepam       | 15 | N05 | N03 | 0.214286 | CL1   |
| Acetazolamide  | 1  | S01 | A10 | 0.214286 | gsom  |
| Aminoglutethir | 1  | L02 | A10 | 0.214286 | gsom  |
| Azathioprine   | 1  | L04 | A10 | 0.214286 | gsom  |
| Cimetidine     | 1  | A02 | A10 | 0.214286 | gsom  |
| Griseofulvin   | 1  | D01 | A10 | 0.214286 | gsom  |
| Hydroxychloro  | 1  | P01 | A10 | 0.214286 | gsom  |
| Isoniazid      | 1  | J04 | A10 | 0.214286 | gsom  |
| Probenecid     | 1  | M04 | A10 | 0.214286 | gsom  |
| Argatroban     | 20 | B01 | C01 | 0.2      | mcode |
| Argatroban     | 20 | B01 | N03 | 0.2      | mcode |
| Argatroban     | 20 | B01 | N05 | 0.2      | mcode |
| Argatroban     | 20 | B01 | N06 | 0.2      | mcode |
| Aripiprazole   | 60 | N05 | A03 | 0.2      | CL1   |
| Aripiprazole   | 60 | N05 | C02 | 0.2      | CL1   |
| Aripiprazole   | 60 | N05 | C03 | 0.2      | CL1   |
| Aripiprazole   | 60 | N05 | G04 | 0.2      | CL1   |
| Bacitracin     | 21 | D06 | R06 | 0.2      | CL1   |
| Bacitracin     | 21 | J01 | R06 | 0.2      | CL1   |
| Bacitracin     | 21 | R02 | R06 | 0.2      | CL1   |
| Biperiden      | 21 | N04 | R06 | 0.2      | CL1   |
| Caffeine       | 21 | N06 | R06 | 0.2      | CL1   |
| Caffeine       | 86 | N06 | A14 | 0.2      | gsom  |
| Caffeine       | 86 | N06 | C04 | 0.2      | gsom  |
| Caffeine       | 86 | N06 | N07 | 0.2      | gsom  |
| Caffeine       | 86 | N06 | S01 | 0.2      | gsom  |
| Carbachol      | 21 | N07 | R06 | 0.2      | CL1   |
| Carbachol      | 86 | N07 | A14 | 0.2      | gsom  |
| Carbachol      | 86 | N07 | C04 | 0.2      | gsom  |
| Carbachol      | 86 | N07 | N06 | 0.2      | gsom  |
| Carbachol      | 86 | S01 | A14 | 0.2      | gsom  |
| Carbachol      | 86 | S01 | C04 | 0.2      | gsom  |
| Carbachol      | 86 | S01 | N06 | 0.2      | gsom  |
| Carbamazepine  | 20 | N03 | B01 | 0.2      | mcode |
| Carbamazepine  | 20 | N03 | C01 | 0.2      | mcode |
| Carbamazepine  | 20 | N03 | N05 | 0.2      | mcode |
| Carbamazepine  | 20 | N03 | N06 | 0.2      | mcode |

|               |     |     |     |     |       |
|---------------|-----|-----|-----|-----|-------|
| Chlorzoxazone | 21  | M03 | R06 | 0.2 | CL1   |
| Clotrimazole  | 371 | D01 | J02 | 0.2 | mcl   |
| Clotrimazole  | 371 | G01 | J02 | 0.2 | mcl   |
| Diltiazem     | 40  | C08 | A02 | 0.2 | gsom  |
| Disulfiram    | 21  | N07 | R06 | 0.2 | CL1   |
| Disulfiram    | 21  | P03 | R06 | 0.2 | CL1   |
| Docetaxel     | 40  | L01 | A02 | 0.2 | gsom  |
| Dofetilide    | 43  | C01 | C07 | 0.2 | CL1   |
| Dofetilide    | 43  | C01 | G04 | 0.2 | CL1   |
| Dofetilide    | 43  | C01 | N03 | 0.2 | CL1   |
| Dofetilide    | 43  | C01 | R03 | 0.2 | CL1   |
| Dolasetron    | 59  | A04 | L01 | 0.2 | CL1   |
| Dolasetron    | 59  | A04 | R03 | 0.2 | CL1   |
| Dolasetron    | 40  | A04 | A02 | 0.2 | gsom  |
| Doxazosin     | 60  | C02 | A03 | 0.2 | CL1   |
| Doxazosin     | 60  | C02 | C03 | 0.2 | CL1   |
| Doxazosin     | 60  | C02 | G04 | 0.2 | CL1   |
| Doxazosin     | 60  | C02 | N05 | 0.2 | CL1   |
| Emedastine    | 12  | S01 | G03 | 0.2 | mcode |
| Etodolac      | 59  | M01 | L01 | 0.2 | CL1   |
| Etodolac      | 59  | M01 | R03 | 0.2 | CL1   |
| Ezetimibe     | 22  | C10 | A02 | 0.2 | CL1   |
| Famotidine    | 22  | A02 | C10 | 0.2 | CL1   |
| Fenofibrate   | 22  | C10 | A02 | 0.2 | CL1   |
| Flecainide    | 12  | C01 | G03 | 0.2 | mcode |
| Flecainide    | 12  | C01 | S01 | 0.2 | mcode |
| Formoterol    | 43  | R03 | C01 | 0.2 | CL1   |
| Formoterol    | 43  | R03 | C07 | 0.2 | CL1   |
| Formoterol    | 43  | R03 | G04 | 0.2 | CL1   |
| Formoterol    | 43  | R03 | N03 | 0.2 | CL1   |
| Formoterol    | 59  | R03 | L01 | 0.2 | CL1   |
| Furosemide    | 60  | C03 | A03 | 0.2 | CL1   |
| Furosemide    | 60  | C03 | C02 | 0.2 | CL1   |
| Furosemide    | 60  | C03 | G04 | 0.2 | CL1   |
| Furosemide    | 60  | C03 | N05 | 0.2 | CL1   |
| Griseofulvin  | 22  | D01 | A02 | 0.2 | CL1   |
| Griseofulvin  | 22  | D01 | C10 | 0.2 | CL1   |
| Hexachlorophe | 22  | D08 | A02 | 0.2 | CL1   |
| Hexachlorophe | 22  | D08 | C10 | 0.2 | CL1   |
| Hydroxychloro | 22  | P01 | A02 | 0.2 | CL1   |
| Hydroxychloro | 22  | P01 | C10 | 0.2 | CL1   |
| Hydroxyzine   | 21  | N05 | R06 | 0.2 | CL1   |
| Imatinib      | 21  | L01 | R06 | 0.2 | CL1   |
| Imiquimod     | 12  | D06 | G03 | 0.2 | mcode |
| Imiquimod     | 12  | D06 | S01 | 0.2 | mcode |
| Irinotecan    | 59  | L01 | R03 | 0.2 | CL1   |
| Isoniazid     | 22  | J04 | A02 | 0.2 | CL1   |
| Isoniazid     | 22  | J04 | C10 | 0.2 | CL1   |
| Labetalol     | 43  | C07 | C01 | 0.2 | CL1   |
| Labetalol     | 43  | C07 | G04 | 0.2 | CL1   |

|               |    |     |     |     |       |
|---------------|----|-----|-----|-----|-------|
| Labetalol     | 43 | C07 | N03 | 0.2 | CL1   |
| Labetalol     | 43 | C07 | R03 | 0.2 | CL1   |
| Levetiracetam | 43 | N03 | C01 | 0.2 | CL1   |
| Levetiracetam | 43 | N03 | C07 | 0.2 | CL1   |
| Levetiracetam | 43 | N03 | G04 | 0.2 | CL1   |
| Levetiracetam | 43 | N03 | R03 | 0.2 | CL1   |
| Loperamide    | 87 | A07 | C08 | 0.2 | gsom  |
| Loperamide    | 87 | A07 | G03 | 0.2 | gsom  |
| Loperamide    | 87 | A07 | R01 | 0.2 | gsom  |
| Loperamide    | 87 | A07 | S01 | 0.2 | gsom  |
| Lorazepam     | 20 | N05 | B01 | 0.2 | mcode |
| Lorazepam     | 20 | N05 | C01 | 0.2 | mcode |
| Lorazepam     | 20 | N05 | N03 | 0.2 | mcode |
| Lorazepam     | 20 | N05 | N06 | 0.2 | mcode |
| Metoclopramic | 60 | A03 | C02 | 0.2 | CL1   |
| Metoclopramic | 60 | A03 | C03 | 0.2 | CL1   |
| Metoclopramic | 60 | A03 | G04 | 0.2 | CL1   |
| Metoclopramic | 60 | A03 | N05 | 0.2 | CL1   |
| Metolazone    | 40 | C03 | A02 | 0.2 | gsom  |
| Mifepristone  | 87 | G03 | A07 | 0.2 | gsom  |
| Mifepristone  | 87 | G03 | C08 | 0.2 | gsom  |
| Mifepristone  | 87 | G03 | R01 | 0.2 | gsom  |
| Mifepristone  | 87 | G03 | S01 | 0.2 | gsom  |
| Milrinone     | 59 | C01 | L01 | 0.2 | CL1   |
| Milrinone     | 59 | C01 | R03 | 0.2 | CL1   |
| Moricizine    | 20 |     | B01 | 0.2 | mcode |
| Moricizine    | 20 |     | C01 | 0.2 | mcode |
| Moricizine    | 20 |     | N03 | 0.2 | mcode |
| Moricizine    | 20 |     | N05 | 0.2 | mcode |
| Moricizine    | 20 |     | N06 | 0.2 | mcode |
| Nabilone      | 40 | A04 | A02 | 0.2 | gsom  |
| Nimodipine    | 87 | C08 | A07 | 0.2 | gsom  |
| Nimodipine    | 87 | C08 | G03 | 0.2 | gsom  |
| Nimodipine    | 87 | C08 | R01 | 0.2 | gsom  |
| Nimodipine    | 87 | C08 | S01 | 0.2 | gsom  |
| Olopatadine   | 87 | R01 | A07 | 0.2 | gsom  |
| Olopatadine   | 87 | R01 | C08 | 0.2 | gsom  |
| Olopatadine   | 87 | R01 | G03 | 0.2 | gsom  |
| Olopatadine   | 87 | S01 | A07 | 0.2 | gsom  |
| Olopatadine   | 87 | S01 | C08 | 0.2 | gsom  |
| Olopatadine   | 87 | S01 | G03 | 0.2 | gsom  |
| Olopatadine   | 12 | S01 | G03 | 0.2 | mcode |
| Orphenadrine  | 21 |     | R06 | 0.2 | CL1   |
| Oxandrolone   | 86 | A14 | C04 | 0.2 | gsom  |
| Oxandrolone   | 86 | A14 | N06 | 0.2 | gsom  |
| Oxandrolone   | 86 | A14 | N07 | 0.2 | gsom  |
| Oxandrolone   | 86 | A14 | S01 | 0.2 | gsom  |
| Oxybutynin    | 12 | G04 | G03 | 0.2 | mcode |
| Oxybutynin    | 12 | G04 | S01 | 0.2 | mcode |
| Paclitaxel    | 40 | L01 | A02 | 0.2 | gsom  |

|               |    |     |     |          |       |
|---------------|----|-----|-----|----------|-------|
| Phenoxybenzar | 86 | C04 | A14 | 0.2      | gsom  |
| Phenoxybenzar | 86 | C04 | N06 | 0.2      | gsom  |
| Phenoxybenzar | 86 | C04 | N07 | 0.2      | gsom  |
| Phenoxybenzar | 86 | C04 | S01 | 0.2      | gsom  |
| Phenytoin     | 12 | N03 | G03 | 0.2      | mcode |
| Phenytoin     | 12 | N03 | S01 | 0.2      | mcode |
| Procainamide  | 20 | C01 | B01 | 0.2      | mcode |
| Procainamide  | 20 | C01 | N03 | 0.2      | mcode |
| Procainamide  | 20 | C01 | N05 | 0.2      | mcode |
| Procainamide  | 20 | C01 | N06 | 0.2      | mcode |
| Reserpine     | 59 | C02 | L01 | 0.2      | CL1   |
| Reserpine     | 59 | C02 | R03 | 0.2      | CL1   |
| Sildenafil    | 60 | G04 | A03 | 0.2      | CL1   |
| Sildenafil    | 60 | G04 | C02 | 0.2      | CL1   |
| Sildenafil    | 60 | G04 | C03 | 0.2      | CL1   |
| Sildenafil    | 60 | G04 | N05 | 0.2      | CL1   |
| Terazosin     | 43 | G04 | C01 | 0.2      | CL1   |
| Terazosin     | 43 | G04 | C07 | 0.2      | CL1   |
| Terazosin     | 43 | G04 | N03 | 0.2      | CL1   |
| Terazosin     | 43 | G04 | R03 | 0.2      | CL1   |
| Brimonidine   | 41 | D11 | N02 | 0.181818 | CL1   |
| Brimonidine   | 41 | S01 | N02 | 0.181818 | CL1   |
| Chloramphenic | 5  | D06 | L01 | 0.181818 | mcode |
| Chloramphenic | 5  | D10 | L01 | 0.181818 | mcode |
| Chloramphenic | 5  | G01 | L01 | 0.181818 | mcode |
| Chloramphenic | 5  | J01 | L01 | 0.181818 | mcode |
| Chloramphenic | 5  | S01 | L01 | 0.181818 | mcode |
| Chloramphenic | 5  | S03 | L01 | 0.181818 | mcode |
| Dexmedetomic  | 41 | N05 | N02 | 0.181818 | CL1   |
| Epinephrine   | 41 | A01 | N02 | 0.181818 | CL1   |
| Epinephrine   | 41 | B02 | N02 | 0.181818 | CL1   |
| Epinephrine   | 41 | C01 | N02 | 0.181818 | CL1   |
| Ethosuximide  | 5  | N03 | L01 | 0.181818 | mcode |
| Clotrimazole  | 55 | A01 | J02 | 0.176471 | gsom  |
| Clotrimazole  | 55 | D01 | J02 | 0.176471 | gsom  |
| Dofetilide    | 55 | C01 | D01 | 0.176471 | gsom  |
| Dofetilide    | 55 | C01 | G01 | 0.176471 | gsom  |
| Dofetilide    | 55 | C01 | J02 | 0.176471 | gsom  |
| Finasteride   | 55 | G04 | D01 | 0.176471 | gsom  |
| Finasteride   | 55 | G04 | G01 | 0.176471 | gsom  |
| Finasteride   | 55 | G04 | J02 | 0.176471 | gsom  |
| Brinzolamide  | 9  | S01 | L02 | 0.173913 | CL1   |
| Clotrimazole  | 9  | A01 | L02 | 0.173913 | CL1   |
| Clotrimazole  | 9  | G01 | L02 | 0.173913 | CL1   |
| Hydroxocobala | 9  | B03 | L02 | 0.173913 | CL1   |
| Hydroxocobala | 9  | V03 | L02 | 0.173913 | CL1   |
| Itraconazole  | 9  | J02 | L02 | 0.173913 | CL1   |
| Bacitracin    | 41 | D06 | C01 | 0.166667 | gsom  |
| Bacitracin    | 41 | D06 | C03 | 0.166667 | gsom  |
| Bacitracin    | 41 | D06 | C05 | 0.166667 | gsom  |

|                 |    |     |     |          |       |
|-----------------|----|-----|-----|----------|-------|
| Bacitracin      | 41 | J01 | C01 | 0.166667 | gsom  |
| Bacitracin      | 41 | J01 | C03 | 0.166667 | gsom  |
| Bacitracin      | 41 | J01 | C05 | 0.166667 | gsom  |
| Bacitracin      | 41 | R02 | C01 | 0.166667 | gsom  |
| Bacitracin      | 41 | R02 | C03 | 0.166667 | gsom  |
| Bacitracin      | 41 | R02 | C05 | 0.166667 | gsom  |
| Eplerenone      | 41 | C03 | C01 | 0.166667 | gsom  |
| Eplerenone      | 41 | C03 | C05 | 0.166667 | gsom  |
| Eplerenone      | 41 | C03 | D06 | 0.166667 | gsom  |
| Eplerenone      | 41 | C03 | J01 | 0.166667 | gsom  |
| Eplerenone      | 41 | C03 | R02 | 0.166667 | gsom  |
| Isosorbide Dini | 41 | C01 | C03 | 0.166667 | gsom  |
| Isosorbide Dini | 41 | C01 | D06 | 0.166667 | gsom  |
| Isosorbide Dini | 41 | C01 | J01 | 0.166667 | gsom  |
| Isosorbide Dini | 41 | C01 | R02 | 0.166667 | gsom  |
| Isosorbide Dini | 41 | C05 | C03 | 0.166667 | gsom  |
| Isosorbide Dini | 41 | C05 | D06 | 0.166667 | gsom  |
| Isosorbide Dini | 41 | C05 | J01 | 0.166667 | gsom  |
| Isosorbide Dini | 41 | C05 | R02 | 0.166667 | gsom  |
| Aminoglutethir  | 30 | L02 | C01 | 0.166667 | CL1   |
| Aminoglutethir  | 30 | L02 | L04 | 0.166667 | CL1   |
| Aminoglutethir  | 30 | L02 | N03 | 0.166667 | CL1   |
| Aminoglutethir  | 30 | L02 | N04 | 0.166667 | CL1   |
| Aminoglutethir  | 30 | L02 | N05 | 0.166667 | CL1   |
| Aripiprazole    | 53 | N05 | A03 | 0.166667 | CL1   |
| Aripiprazole    | 53 | N05 | A07 | 0.166667 | CL1   |
| Aripiprazole    | 53 | N05 | C03 | 0.166667 | CL1   |
| Aripiprazole    | 53 | N05 | G04 | 0.166667 | CL1   |
| Aripiprazole    | 53 | N05 | M03 | 0.166667 | CL1   |
| Atomoxetine     | 26 | N06 | A08 | 0.166667 | mcode |
| Atomoxetine     | 26 | N06 | C02 | 0.166667 | mcode |
| Atomoxetine     | 26 | N06 | J04 | 0.166667 | mcode |
| Atomoxetine     | 26 | N06 | M04 | 0.166667 | mcode |
| Atomoxetine     | 26 | N06 | N02 | 0.166667 | mcode |
| Bosentan        | 26 | C02 | A08 | 0.166667 | mcode |
| Bosentan        | 26 | C02 | J04 | 0.166667 | mcode |
| Bosentan        | 26 | C02 | M04 | 0.166667 | mcode |
| Bosentan        | 26 | C02 | N02 | 0.166667 | mcode |
| Bosentan        | 26 | C02 | N06 | 0.166667 | mcode |
| Dantrolene      | 53 | M03 | A03 | 0.166667 | CL1   |
| Dantrolene      | 53 | M03 | A07 | 0.166667 | CL1   |
| Dantrolene      | 53 | M03 | C03 | 0.166667 | CL1   |
| Dantrolene      | 53 | M03 | G04 | 0.166667 | CL1   |
| Dantrolene      | 53 | M03 | N05 | 0.166667 | CL1   |
| Doxorubicin     | 27 | L01 | G02 | 0.166667 | CL1   |
| Doxorubicin     | 27 | L01 | M01 | 0.166667 | CL1   |
| Doxorubicin     | 27 | L01 | M02 | 0.166667 | CL1   |
| Doxorubicin     | 27 | L01 | N03 | 0.166667 | CL1   |
| Doxorubicin     | 27 | L01 | N06 | 0.166667 | CL1   |
| Droperidol      | 30 | N05 | C01 | 0.166667 | CL1   |

|               |    |     |     |          |       |
|---------------|----|-----|-----|----------|-------|
| Droperidol    | 30 | N05 | L02 | 0.166667 | CL1   |
| Droperidol    | 30 | N05 | L04 | 0.166667 | CL1   |
| Droperidol    | 30 | N05 | N03 | 0.166667 | CL1   |
| Droperidol    | 30 | N05 | N04 | 0.166667 | CL1   |
| Entacapone    | 15 | N04 | A10 | 0.166667 | mcode |
| Entacapone    | 15 | N04 | H03 | 0.166667 | mcode |
| Entacapone    | 15 | N04 | L01 | 0.166667 | mcode |
| Entacapone    | 15 | N04 | N05 | 0.166667 | mcode |
| Entacapone    | 15 | N04 | R03 | 0.166667 | mcode |
| Epinephrine   | 19 | A01 | N05 | 0.166667 | CL1   |
| Epinephrine   | 19 | B02 | N05 | 0.166667 | CL1   |
| Epinephrine   | 19 | R01 | N05 | 0.166667 | CL1   |
| Epinephrine   | 19 | S01 | N05 | 0.166667 | CL1   |
| Furosemide    | 53 | C03 | A03 | 0.166667 | CL1   |
| Furosemide    | 53 | C03 | A07 | 0.166667 | CL1   |
| Furosemide    | 53 | C03 | G04 | 0.166667 | CL1   |
| Furosemide    | 53 | C03 | M03 | 0.166667 | CL1   |
| Furosemide    | 53 | C03 | N05 | 0.166667 | CL1   |
| Lamotrigine   | 27 | N03 | G02 | 0.166667 | CL1   |
| Lamotrigine   | 27 | N03 | L01 | 0.166667 | CL1   |
| Lamotrigine   | 27 | N03 | M01 | 0.166667 | CL1   |
| Lamotrigine   | 27 | N03 | M02 | 0.166667 | CL1   |
| Lamotrigine   | 27 | N03 | N06 | 0.166667 | CL1   |
| Leflunomide   | 30 | L04 | C01 | 0.166667 | CL1   |
| Leflunomide   | 30 | L04 | L02 | 0.166667 | CL1   |
| Leflunomide   | 30 | L04 | N03 | 0.166667 | CL1   |
| Leflunomide   | 30 | L04 | N04 | 0.166667 | CL1   |
| Leflunomide   | 30 | L04 | N05 | 0.166667 | CL1   |
| Lithium       | 15 | N05 | A10 | 0.166667 | mcode |
| Lithium       | 15 | N05 | H03 | 0.166667 | mcode |
| Lithium       | 15 | N05 | L01 | 0.166667 | mcode |
| Lithium       | 15 | N05 | N04 | 0.166667 | mcode |
| Lithium       | 15 | N05 | R03 | 0.166667 | mcode |
| Methimazole   | 15 |     | A10 | 0.166667 | mcode |
| Methimazole   | 15 |     | H03 | 0.166667 | mcode |
| Methimazole   | 15 |     | L01 | 0.166667 | mcode |
| Methimazole   | 15 |     | N04 | 0.166667 | mcode |
| Methimazole   | 15 |     | N05 | 0.166667 | mcode |
| Methimazole   | 15 |     | R03 | 0.166667 | mcode |
| Metoclopramic | 53 | A03 | A07 | 0.166667 | CL1   |
| Metoclopramic | 53 | A03 | C03 | 0.166667 | CL1   |
| Metoclopramic | 53 | A03 | G04 | 0.166667 | CL1   |
| Metoclopramic | 53 | A03 | M03 | 0.166667 | CL1   |
| Metoclopramic | 53 | A03 | N05 | 0.166667 | CL1   |
| Miglitol      | 15 | A10 | H03 | 0.166667 | mcode |
| Miglitol      | 15 | A10 | L01 | 0.166667 | mcode |
| Miglitol      | 15 | A10 | N04 | 0.166667 | mcode |
| Miglitol      | 15 | A10 | N05 | 0.166667 | mcode |
| Miglitol      | 15 | A10 | R03 | 0.166667 | mcode |
| Mirtazapine   | 27 | N06 | G02 | 0.166667 | CL1   |

|               |    |     |     |          |       |
|---------------|----|-----|-----|----------|-------|
| Mirtazapine   | 27 | N06 | L01 | 0.166667 | CL1   |
| Mirtazapine   | 27 | N06 | M01 | 0.166667 | CL1   |
| Mirtazapine   | 27 | N06 | M02 | 0.166667 | CL1   |
| Mirtazapine   | 27 | N06 | N03 | 0.166667 | CL1   |
| Mitotane      | 15 | L01 | A10 | 0.166667 | mcode |
| Mitotane      | 15 | L01 | H03 | 0.166667 | mcode |
| Mitotane      | 15 | L01 | N04 | 0.166667 | mcode |
| Mitotane      | 15 | L01 | N05 | 0.166667 | mcode |
| Mitotane      | 15 | L01 | R03 | 0.166667 | mcode |
| Molindone     | 19 | N05 | C01 | 0.166667 | CL1   |
| Molindone     | 19 | N05 | R03 | 0.166667 | CL1   |
| Nalbuphine    | 26 | N02 | A08 | 0.166667 | mcode |
| Nalbuphine    | 26 | N02 | C02 | 0.166667 | mcode |
| Nalbuphine    | 26 | N02 | J04 | 0.166667 | mcode |
| Nalbuphine    | 26 | N02 | M04 | 0.166667 | mcode |
| Nalbuphine    | 26 | N02 | N06 | 0.166667 | mcode |
| Naloxone      | 19 | V03 | C01 | 0.166667 | CL1   |
| Naloxone      | 19 | V03 | N05 | 0.166667 | CL1   |
| Naloxone      | 19 | V03 | R03 | 0.166667 | CL1   |
| Naproxen      | 27 | G02 | L01 | 0.166667 | CL1   |
| Naproxen      | 27 | G02 | N03 | 0.166667 | CL1   |
| Naproxen      | 27 | G02 | N06 | 0.166667 | CL1   |
| Naproxen      | 27 | M01 | L01 | 0.166667 | CL1   |
| Naproxen      | 27 | M01 | N03 | 0.166667 | CL1   |
| Naproxen      | 27 | M01 | N06 | 0.166667 | CL1   |
| Naproxen      | 27 | M02 | L01 | 0.166667 | CL1   |
| Naproxen      | 27 | M02 | N03 | 0.166667 | CL1   |
| Naproxen      | 27 | M02 | N06 | 0.166667 | CL1   |
| Ofloxacin     | 46 | J01 | A10 | 0.166667 | mcode |
| Ofloxacin     | 46 | J01 | L01 | 0.166667 | mcode |
| Ofloxacin     | 46 | J01 | N07 | 0.166667 | mcode |
| Ofloxacin     | 46 | S01 | A10 | 0.166667 | mcode |
| Ofloxacin     | 46 | S01 | L01 | 0.166667 | mcode |
| Ofloxacin     | 46 | S01 | N07 | 0.166667 | mcode |
| Ofloxacin     | 46 | S02 | A10 | 0.166667 | mcode |
| Ofloxacin     | 46 | S02 | L01 | 0.166667 | mcode |
| Ofloxacin     | 46 | S02 | N07 | 0.166667 | mcode |
| Orlistat      | 26 | A08 | C02 | 0.166667 | mcode |
| Orlistat      | 26 | A08 | J04 | 0.166667 | mcode |
| Orlistat      | 26 | A08 | M04 | 0.166667 | mcode |
| Orlistat      | 26 | A08 | N02 | 0.166667 | mcode |
| Orlistat      | 26 | A08 | N06 | 0.166667 | mcode |
| Orphenadrine  | 19 |     | C01 | 0.166667 | CL1   |
| Orphenadrine  | 19 |     | N05 | 0.166667 | CL1   |
| Orphenadrine  | 19 |     | R03 | 0.166667 | CL1   |
| Oxcarbazepine | 30 | N03 | C01 | 0.166667 | CL1   |
| Oxcarbazepine | 30 | N03 | L02 | 0.166667 | CL1   |
| Oxcarbazepine | 30 | N03 | L04 | 0.166667 | CL1   |
| Oxcarbazepine | 30 | N03 | N04 | 0.166667 | CL1   |
| Oxcarbazepine | 30 | N03 | N05 | 0.166667 | CL1   |



|                 |    |     |     |          |       |
|-----------------|----|-----|-----|----------|-------|
| Procainamide    | 30 | C01 | L02 | 0.166667 | CL1   |
| Procainamide    | 30 | C01 | L04 | 0.166667 | CL1   |
| Procainamide    | 30 | C01 | N03 | 0.166667 | CL1   |
| Procainamide    | 30 | C01 | N04 | 0.166667 | CL1   |
| Procainamide    | 30 | C01 | N05 | 0.166667 | CL1   |
| Repaglinide     | 46 | A10 | J01 | 0.166667 | mcode |
| Repaglinide     | 46 | A10 | L01 | 0.166667 | mcode |
| Repaglinide     | 46 | A10 | N07 | 0.166667 | mcode |
| Repaglinide     | 46 | A10 | S01 | 0.166667 | mcode |
| Repaglinide     | 46 | A10 | S02 | 0.166667 | mcode |
| Rifabutin       | 26 | J04 | A08 | 0.166667 | mcode |
| Rifabutin       | 26 | J04 | C02 | 0.166667 | mcode |
| Rifabutin       | 26 | J04 | M04 | 0.166667 | mcode |
| Rifabutin       | 26 | J04 | N02 | 0.166667 | mcode |
| Rifabutin       | 26 | J04 | N06 | 0.166667 | mcode |
| Riluzole        | 46 | N07 | A10 | 0.166667 | mcode |
| Riluzole        | 46 | N07 | J01 | 0.166667 | mcode |
| Riluzole        | 46 | N07 | L01 | 0.166667 | mcode |
| Riluzole        | 46 | N07 | S01 | 0.166667 | mcode |
| Riluzole        | 46 | N07 | S02 | 0.166667 | mcode |
| Ropinirole      | 30 | N04 | C01 | 0.166667 | CL1   |
| Ropinirole      | 30 | N04 | L02 | 0.166667 | CL1   |
| Ropinirole      | 30 | N04 | L04 | 0.166667 | CL1   |
| Ropinirole      | 30 | N04 | N03 | 0.166667 | CL1   |
| Ropinirole      | 30 | N04 | N05 | 0.166667 | CL1   |
| Sildenafil      | 53 | G04 | A03 | 0.166667 | CL1   |
| Sildenafil      | 53 | G04 | A07 | 0.166667 | CL1   |
| Sildenafil      | 53 | G04 | C03 | 0.166667 | CL1   |
| Sildenafil      | 53 | G04 | M03 | 0.166667 | CL1   |
| Sildenafil      | 53 | G04 | N05 | 0.166667 | CL1   |
| Sulfasalazine   | 53 | A07 | A03 | 0.166667 | CL1   |
| Sulfasalazine   | 53 | A07 | C03 | 0.166667 | CL1   |
| Sulfasalazine   | 53 | A07 | G04 | 0.166667 | CL1   |
| Sulfasalazine   | 53 | A07 | M03 | 0.166667 | CL1   |
| Sulfasalazine   | 53 | A07 | N05 | 0.166667 | CL1   |
| Sulfinpyrazone  | 26 | M04 | A08 | 0.166667 | mcode |
| Sulfinpyrazone  | 26 | M04 | C02 | 0.166667 | mcode |
| Sulfinpyrazone  | 26 | M04 | J04 | 0.166667 | mcode |
| Sulfinpyrazone  | 26 | M04 | N02 | 0.166667 | mcode |
| Sulfinpyrazone  | 26 | M04 | N06 | 0.166667 | mcode |
| Teniposide      | 46 | L01 | A10 | 0.166667 | mcode |
| Teniposide      | 46 | L01 | J01 | 0.166667 | mcode |
| Teniposide      | 46 | L01 | N07 | 0.166667 | mcode |
| Teniposide      | 46 | L01 | S01 | 0.166667 | mcode |
| Teniposide      | 46 | L01 | S02 | 0.166667 | mcode |
| Chlorpropamid   | 5  | A10 | S01 | 0.153846 | gsom  |
| Ethosuximide    | 5  | N03 | S01 | 0.153846 | gsom  |
| Propylthiouraci | 5  | H03 | S01 | 0.153846 | gsom  |
| Pyrazinamide    | 5  | J04 | S01 | 0.153846 | gsom  |
| Amiodarone      | 23 | C01 | C02 | 0.153846 | CL1   |

|               |     |     |     |          |     |
|---------------|-----|-----|-----|----------|-----|
| Amiodarone    | 23  | C01 | N01 | 0.153846 | CL1 |
| Amiodarone    | 23  | C01 | N07 | 0.153846 | CL1 |
| Atorvastatin  | 58  | C10 | G04 | 0.153846 | CL1 |
| Atorvastatin  | 58  | C10 | M01 | 0.153846 | CL1 |
| Atorvastatin  | 58  | C10 | N05 | 0.153846 | CL1 |
| Doxazosin     | 23  | C02 | C01 | 0.153846 | CL1 |
| Doxazosin     | 23  | C02 | N01 | 0.153846 | CL1 |
| Doxazosin     | 23  | C02 | N07 | 0.153846 | CL1 |
| Doxazosin     | 58  | C02 | C10 | 0.153846 | CL1 |
| Doxazosin     | 58  | C02 | G04 | 0.153846 | CL1 |
| Doxazosin     | 58  | C02 | M01 | 0.153846 | CL1 |
| Doxazosin     | 58  | C02 | N05 | 0.153846 | CL1 |
| Ketorolac     | 58  | M01 | C10 | 0.153846 | CL1 |
| Ketorolac     | 58  | M01 | G04 | 0.153846 | CL1 |
| Ketorolac     | 58  | M01 | N05 | 0.153846 | CL1 |
| Methadone     | 23  | N07 | C01 | 0.153846 | CL1 |
| Methadone     | 23  | N07 | C02 | 0.153846 | CL1 |
| Methadone     | 23  | N07 | N01 | 0.153846 | CL1 |
| Mexiletine    | 23  | C01 | C02 | 0.153846 | CL1 |
| Mexiletine    | 23  | C01 | N01 | 0.153846 | CL1 |
| Mexiletine    | 23  | C01 | N07 | 0.153846 | CL1 |
| Molindone     | 58  | N05 | C10 | 0.153846 | CL1 |
| Molindone     | 58  | N05 | G04 | 0.153846 | CL1 |
| Molindone     | 58  | N05 | M01 | 0.153846 | CL1 |
| Moricizine    | 23  |     | C01 | 0.153846 | CL1 |
| Moricizine    | 23  |     | C02 | 0.153846 | CL1 |
| Moricizine    | 23  |     | N01 | 0.153846 | CL1 |
| Moricizine    | 23  |     | N07 | 0.153846 | CL1 |
| Morphine      | 23  | N02 | C01 | 0.153846 | CL1 |
| Morphine      | 23  | N02 | C02 | 0.153846 | CL1 |
| Morphine      | 23  | N02 | N01 | 0.153846 | CL1 |
| Morphine      | 23  | N02 | N07 | 0.153846 | CL1 |
| Risperidone   | 58  | N05 | C10 | 0.153846 | CL1 |
| Risperidone   | 58  | N05 | G04 | 0.153846 | CL1 |
| Risperidone   | 58  | N05 | M01 | 0.153846 | CL1 |
| Adenosine     | 5   | C01 | L01 | 0.152941 | CL1 |
| Allopurinol   | 5   | M04 | L01 | 0.152941 | CL1 |
| Amifostine    | 5   | V03 | L01 | 0.152941 | CL1 |
| Apraclonidine | 5   | S01 | L01 | 0.152941 | CL1 |
| Atovaquone    | 5   | P01 | L01 | 0.152941 | CL1 |
| Carbachol     | 5   | N07 | L01 | 0.152941 | CL1 |
| Carbachol     | 5   | S01 | L01 | 0.152941 | CL1 |
| Cysteamine    | 5   |     | L01 | 0.152941 | CL1 |
| Diazoxide     | 5   | V03 | L01 | 0.152941 | CL1 |
| Didanosine    | 5   | J05 | L01 | 0.152941 | CL1 |
| Dobutamine    | 5   | C01 | L01 | 0.152941 | CL1 |
| Emedastine    | 5   | S01 | L01 | 0.152941 | CL1 |
| Tetracycline  | 331 | A01 | L01 | 0.142857 | mcl |
| Tetracycline  | 331 | D06 | L01 | 0.142857 | mcl |
| Tetracycline  | 331 | J01 | L01 | 0.142857 | mcl |

|                |     |     |     |          |      |
|----------------|-----|-----|-----|----------|------|
| Tetracycline   | 331 | S01 | L01 | 0.142857 | mcl  |
| Tetracycline   | 331 | S02 | L01 | 0.142857 | mcl  |
| Tetracycline   | 331 | S03 | L01 | 0.142857 | mcl  |
| Vinblastine    | 331 | L01 | A01 | 0.142857 | mcl  |
| Vinblastine    | 331 | L01 | D06 | 0.142857 | mcl  |
| Vinblastine    | 331 | L01 | J01 | 0.142857 | mcl  |
| Vinblastine    | 331 | L01 | S01 | 0.142857 | mcl  |
| Vinblastine    | 331 | L01 | S02 | 0.142857 | mcl  |
| Vinblastine    | 331 | L01 | S03 | 0.142857 | mcl  |
| Adenosine      | 60  | C01 | A08 | 0.125    | gsom |
| Adenosine      | 60  | C01 | C02 | 0.125    | gsom |
| Adenosine      | 60  | C01 | C04 | 0.125    | gsom |
| Adenosine      | 60  | C01 | D11 | 0.125    | gsom |
| Adenosine      | 60  | C01 | J05 | 0.125    | gsom |
| Adenosine      | 60  | C01 | M04 | 0.125    | gsom |
| Adenosine      | 60  | C01 | V03 | 0.125    | gsom |
| Allopurinol    | 60  | M04 | A08 | 0.125    | gsom |
| Allopurinol    | 60  | M04 | C01 | 0.125    | gsom |
| Allopurinol    | 60  | M04 | C02 | 0.125    | gsom |
| Allopurinol    | 60  | M04 | C04 | 0.125    | gsom |
| Allopurinol    | 60  | M04 | D11 | 0.125    | gsom |
| Allopurinol    | 60  | M04 | J05 | 0.125    | gsom |
| Allopurinol    | 60  | M04 | V03 | 0.125    | gsom |
| Azelastine     | 28  | S01 | A10 | 0.125    | CL1  |
| Azelastine     | 28  | S01 | C03 | 0.125    | CL1  |
| Azelastine     | 28  | S01 | C09 | 0.125    | CL1  |
| Azelastine     | 28  | S01 | N03 | 0.125    | CL1  |
| Bumetanide     | 28  | C03 | A10 | 0.125    | CL1  |
| Bumetanide     | 28  | C03 | C09 | 0.125    | CL1  |
| Bumetanide     | 28  | C03 | N03 | 0.125    | CL1  |
| Bumetanide     | 28  | C03 | R06 | 0.125    | CL1  |
| Chlorthalidone | 28  |     | A10 | 0.125    | CL1  |
| Chlorthalidone | 28  |     | C03 | 0.125    | CL1  |
| Chlorthalidone | 28  |     | C09 | 0.125    | CL1  |
| Chlorthalidone | 28  |     | N03 | 0.125    | CL1  |
| Chlorthalidone | 28  |     | R06 | 0.125    | CL1  |
| Ethotoin       | 28  | N03 | A10 | 0.125    | CL1  |
| Ethotoin       | 28  | N03 | C03 | 0.125    | CL1  |
| Ethotoin       | 28  | N03 | C09 | 0.125    | CL1  |
| Ethotoin       | 28  | N03 | R06 | 0.125    | CL1  |
| Glimepiride    | 28  | A10 | C03 | 0.125    | CL1  |
| Glimepiride    | 28  | A10 | C09 | 0.125    | CL1  |
| Glimepiride    | 28  | A10 | N03 | 0.125    | CL1  |
| Glimepiride    | 28  | A10 | R06 | 0.125    | CL1  |
| Ketamine       | 28  | N01 | A10 | 0.125    | CL1  |
| Ketamine       | 28  | N01 | C03 | 0.125    | CL1  |
| Ketamine       | 28  | N01 | C09 | 0.125    | CL1  |
| Ketamine       | 28  | N01 | N03 | 0.125    | CL1  |
| Ketamine       | 28  | N01 | R06 | 0.125    | CL1  |
| Minoxidil      | 60  | C02 | A08 | 0.125    | gsom |

|                 |    |     |     |          |      |
|-----------------|----|-----|-----|----------|------|
| Minoxidil       | 60 | C02 | C01 | 0.125    | gsom |
| Minoxidil       | 60 | C02 | C04 | 0.125    | gsom |
| Minoxidil       | 60 | C02 | J05 | 0.125    | gsom |
| Minoxidil       | 60 | C02 | M04 | 0.125    | gsom |
| Minoxidil       | 60 | C02 | V03 | 0.125    | gsom |
| Minoxidil       | 60 | D11 | A08 | 0.125    | gsom |
| Minoxidil       | 60 | D11 | C01 | 0.125    | gsom |
| Minoxidil       | 60 | D11 | C04 | 0.125    | gsom |
| Minoxidil       | 60 | D11 | J05 | 0.125    | gsom |
| Minoxidil       | 60 | D11 | M04 | 0.125    | gsom |
| Minoxidil       | 60 | D11 | V03 | 0.125    | gsom |
| Orlistat        | 60 | A08 | C01 | 0.125    | gsom |
| Orlistat        | 60 | A08 | C02 | 0.125    | gsom |
| Orlistat        | 60 | A08 | C04 | 0.125    | gsom |
| Orlistat        | 60 | A08 | D11 | 0.125    | gsom |
| Orlistat        | 60 | A08 | J05 | 0.125    | gsom |
| Orlistat        | 60 | A08 | M04 | 0.125    | gsom |
| Orlistat        | 60 | A08 | V03 | 0.125    | gsom |
| Phentolamine    | 60 | C04 | A08 | 0.125    | gsom |
| Phentolamine    | 60 | C04 | C01 | 0.125    | gsom |
| Phentolamine    | 60 | C04 | C02 | 0.125    | gsom |
| Phentolamine    | 60 | C04 | D11 | 0.125    | gsom |
| Phentolamine    | 60 | C04 | J05 | 0.125    | gsom |
| Phentolamine    | 60 | C04 | M04 | 0.125    | gsom |
| Phentolamine    | 60 | V03 | A08 | 0.125    | gsom |
| Phentolamine    | 60 | V03 | C01 | 0.125    | gsom |
| Phentolamine    | 60 | V03 | C02 | 0.125    | gsom |
| Phentolamine    | 60 | V03 | D11 | 0.125    | gsom |
| Phentolamine    | 60 | V03 | J05 | 0.125    | gsom |
| Phentolamine    | 60 | V03 | M04 | 0.125    | gsom |
| Ribavirin       | 60 | J05 | A08 | 0.125    | gsom |
| Ribavirin       | 60 | J05 | C01 | 0.125    | gsom |
| Ribavirin       | 60 | J05 | C02 | 0.125    | gsom |
| Ribavirin       | 60 | J05 | C04 | 0.125    | gsom |
| Ribavirin       | 60 | J05 | D11 | 0.125    | gsom |
| Ribavirin       | 60 | J05 | M04 | 0.125    | gsom |
| Ribavirin       | 60 | J05 | V03 | 0.125    | gsom |
| Acarbose        | 16 | A10 | N03 | 0.122449 | CL1  |
| Aminoglutethir  | 16 | L02 | A10 | 0.122449 | CL1  |
| Aminoglutethir  | 16 | L02 | N03 | 0.122449 | CL1  |
| Aspirin         | 16 |     | A10 | 0.122449 | CL1  |
| Aspirin         | 16 |     | N03 | 0.122449 | CL1  |
| Bumetanide      | 16 | C03 | A10 | 0.122449 | CL1  |
| Bumetanide      | 16 | C03 | N03 | 0.122449 | CL1  |
| Chloramphenic   | 16 | D06 | A10 | 0.122449 | CL1  |
| Chloramphenic   | 16 | D06 | N03 | 0.122449 | CL1  |
| Chlorthalidone  | 16 |     | A10 | 0.122449 | CL1  |
| Chlorthalidone  | 16 |     | N03 | 0.122449 | CL1  |
| Ethacrynic Acid | 16 |     | A10 | 0.122449 | CL1  |
| Ethacrynic Acid | 16 |     | N03 | 0.122449 | CL1  |

|                |    |     |     |          |       |
|----------------|----|-----|-----|----------|-------|
| Ethosuximide   | 16 | N03 | A10 | 0.122449 | CL1   |
| Ethotoin       | 16 | N03 | A10 | 0.122449 | CL1   |
| Methimazole    | 16 |     | A10 | 0.122449 | CL1   |
| Methimazole    | 16 |     | N03 | 0.122449 | CL1   |
| Argatroban     | 24 | B01 | L01 | 0.11828  | CL1   |
| Bacitracin     | 24 | R02 | L01 | 0.11828  | CL1   |
| Cefazolin      | 24 | J01 | L01 | 0.11828  | CL1   |
| Chloramphenic  | 24 | G01 | L01 | 0.11828  | CL1   |
| Chloramphenic  | 24 | S01 | L01 | 0.11828  | CL1   |
| Chloramphenic  | 24 | S03 | L01 | 0.11828  | CL1   |
| Chlorpropamid  | 24 | A10 | L01 | 0.11828  | CL1   |
| Chlorzoxazone  | 24 | M03 | L01 | 0.11828  | CL1   |
| Cysteamine     | 24 |     | L01 | 0.11828  | CL1   |
| Dantrolene     | 24 | M03 | L01 | 0.11828  | CL1   |
| Didanosine     | 24 | J05 | L01 | 0.11828  | CL1   |
| Digoxin        | 24 | C01 | L01 | 0.11828  | CL1   |
| Diltiazem      | 24 | C08 | L01 | 0.11828  | CL1   |
| Disulfiram     | 24 | N07 | L01 | 0.11828  | CL1   |
| Dolasetron     | 24 | A04 | L01 | 0.11828  | CL1   |
| Entacapone     | 24 | N04 | L01 | 0.11828  | CL1   |
| Eplerenone     | 24 | C03 | L01 | 0.11828  | CL1   |
| Ethionamide    | 24 | J04 | L01 | 0.11828  | CL1   |
| Galantamine    | 24 | N06 | L01 | 0.11828  | CL1   |
| Glycopyrrolate | 24 |     | L01 | 0.11828  | CL1   |
| Hydroxyurea    | 24 |     | L01 | 0.11828  | CL1   |
| Indapamide     | 24 | C03 | L01 | 0.11828  | CL1   |
| Methimazole    | 24 |     | L01 | 0.11828  | CL1   |
| Nitroglycerin  | 24 |     | L01 | 0.11828  | CL1   |
| Bacitracin     | 8  | D06 | C04 | 0.111111 | mcode |
| Bacitracin     | 8  | D06 | M03 | 0.111111 | mcode |
| Bacitracin     | 8  | D06 | N06 | 0.111111 | mcode |
| Bacitracin     | 8  | D06 | N07 | 0.111111 | mcode |
| Bacitracin     | 8  | D06 | P03 | 0.111111 | mcode |
| Bacitracin     | 8  | D06 | S01 | 0.111111 | mcode |
| Bacitracin     | 8  | J01 | C04 | 0.111111 | mcode |
| Bacitracin     | 8  | J01 | M03 | 0.111111 | mcode |
| Bacitracin     | 8  | J01 | N06 | 0.111111 | mcode |
| Bacitracin     | 8  | J01 | N07 | 0.111111 | mcode |
| Bacitracin     | 8  | J01 | P03 | 0.111111 | mcode |
| Bacitracin     | 8  | J01 | S01 | 0.111111 | mcode |
| Bacitracin     | 8  | R02 | C04 | 0.111111 | mcode |
| Bacitracin     | 8  | R02 | M03 | 0.111111 | mcode |
| Bacitracin     | 8  | R02 | N06 | 0.111111 | mcode |
| Bacitracin     | 8  | R02 | N07 | 0.111111 | mcode |
| Bacitracin     | 8  | R02 | P03 | 0.111111 | mcode |
| Bacitracin     | 8  | R02 | S01 | 0.111111 | mcode |
| Caffeine       | 8  | N06 | C04 | 0.111111 | mcode |
| Caffeine       | 8  | N06 | D06 | 0.111111 | mcode |
| Caffeine       | 8  | N06 | J01 | 0.111111 | mcode |
| Caffeine       | 8  | N06 | M03 | 0.111111 | mcode |

|               |     |     |     |          |       |
|---------------|-----|-----|-----|----------|-------|
| Caffeine      | 8   | N06 | N07 | 0.111111 | mcode |
| Caffeine      | 8   | N06 | P03 | 0.111111 | mcode |
| Caffeine      | 8   | N06 | R02 | 0.111111 | mcode |
| Caffeine      | 8   | N06 | S01 | 0.111111 | mcode |
| Carbachol     | 8   | N07 | C04 | 0.111111 | mcode |
| Carbachol     | 8   | N07 | D06 | 0.111111 | mcode |
| Carbachol     | 8   | N07 | J01 | 0.111111 | mcode |
| Carbachol     | 8   | N07 | M03 | 0.111111 | mcode |
| Carbachol     | 8   | N07 | N06 | 0.111111 | mcode |
| Carbachol     | 8   | N07 | P03 | 0.111111 | mcode |
| Carbachol     | 8   | N07 | R02 | 0.111111 | mcode |
| Carbachol     | 8   | S01 | C04 | 0.111111 | mcode |
| Carbachol     | 8   | S01 | D06 | 0.111111 | mcode |
| Carbachol     | 8   | S01 | J01 | 0.111111 | mcode |
| Carbachol     | 8   | S01 | M03 | 0.111111 | mcode |
| Carbachol     | 8   | S01 | N06 | 0.111111 | mcode |
| Carbachol     | 8   | S01 | P03 | 0.111111 | mcode |
| Carbachol     | 8   | S01 | R02 | 0.111111 | mcode |
| Chlorzoxazone | 8   | M03 | C04 | 0.111111 | mcode |
| Chlorzoxazone | 8   | M03 | D06 | 0.111111 | mcode |
| Chlorzoxazone | 8   | M03 | J01 | 0.111111 | mcode |
| Chlorzoxazone | 8   | M03 | N06 | 0.111111 | mcode |
| Chlorzoxazone | 8   | M03 | N07 | 0.111111 | mcode |
| Chlorzoxazone | 8   | M03 | P03 | 0.111111 | mcode |
| Chlorzoxazone | 8   | M03 | R02 | 0.111111 | mcode |
| Chlorzoxazone | 8   | M03 | S01 | 0.111111 | mcode |
| Malathion     | 8   | P03 | C04 | 0.111111 | mcode |
| Malathion     | 8   | P03 | D06 | 0.111111 | mcode |
| Malathion     | 8   | P03 | J01 | 0.111111 | mcode |
| Malathion     | 8   | P03 | M03 | 0.111111 | mcode |
| Malathion     | 8   | P03 | N06 | 0.111111 | mcode |
| Malathion     | 8   | P03 | N07 | 0.111111 | mcode |
| Malathion     | 8   | P03 | R02 | 0.111111 | mcode |
| Malathion     | 8   | P03 | S01 | 0.111111 | mcode |
| Phenoxybenzar | 8   | C04 | D06 | 0.111111 | mcode |
| Phenoxybenzar | 8   | C04 | J01 | 0.111111 | mcode |
| Phenoxybenzar | 8   | C04 | M03 | 0.111111 | mcode |
| Phenoxybenzar | 8   | C04 | N06 | 0.111111 | mcode |
| Phenoxybenzar | 8   | C04 | N07 | 0.111111 | mcode |
| Phenoxybenzar | 8   | C04 | P03 | 0.111111 | mcode |
| Phenoxybenzar | 8   | C04 | R02 | 0.111111 | mcode |
| Phenoxybenzar | 8   | C04 | S01 | 0.111111 | mcode |
| Allopurinol   | 417 | M04 | L01 | 0.103627 | mcl   |
| Amifostine    | 417 | V03 | L01 | 0.103627 | mcl   |
| Amiodarone    | 417 | C01 | L01 | 0.103627 | mcl   |
| Apraclonidine | 417 | S01 | L01 | 0.103627 | mcl   |
| Bacitracin    | 417 | J01 | L01 | 0.103627 | mcl   |
| Baclofen      | 417 | M03 | L01 | 0.103627 | mcl   |
| Bosentan      | 417 | C02 | L01 | 0.103627 | mcl   |
| Caffeine      | 417 | N06 | L01 | 0.103627 | mcl   |

|                 |     |     |     |          |       |
|-----------------|-----|-----|-----|----------|-------|
| Chloramphenic   | 417 | G01 | L01 | 0.103627 | mcl   |
| Chloramphenic   | 417 | J01 | L01 | 0.103627 | mcl   |
| Ciprofloxacin   | 417 | S02 | L01 | 0.103627 | mcl   |
| Clomipramine    | 417 | N06 | L01 | 0.103627 | mcl   |
| Cysteamine      | 417 |     | L01 | 0.103627 | mcl   |
| Diazoxide       | 417 | C02 | L01 | 0.103627 | mcl   |
| Glycopyrrolate  | 417 |     | L01 | 0.103627 | mcl   |
| Hydroxyurea     | 417 |     | L01 | 0.103627 | mcl   |
| Methimazole     | 417 |     | L01 | 0.103627 | mcl   |
| Moricizine      | 417 |     | L01 | 0.103627 | mcl   |
| Nitroglycerin   | 417 |     | L01 | 0.103627 | mcl   |
| Acetazolamide   | 0   | S01 | N05 | 0.071856 | mcode |
| Acitretin       | 0   | D05 | N05 | 0.071856 | mcode |
| Bicalutamide    | 0   | L02 | N05 | 0.071856 | mcode |
| Bromocriptine   | 0   | N04 | N05 | 0.071856 | mcode |
| Capecitabine    | 0   | L01 | N05 | 0.071856 | mcode |
| Celecoxib       | 0   | M01 | N05 | 0.071856 | mcode |
| Chlorthalidone  | 0   |     | N05 | 0.071856 | mcode |
| Clotrimazole    | 0   | A01 | N05 | 0.071856 | mcode |
| Desloratadine   | 0   | R06 | N05 | 0.071856 | mcode |
| Ethacrynic Acid | 0   |     | N05 | 0.071856 | mcode |
| Cysteamine      | 13  |     | A01 | 0.055556 | mcode |
| Cysteamine      | 13  |     | A14 | 0.055556 | mcode |
| Cysteamine      | 13  |     | B01 | 0.055556 | mcode |
| Cysteamine      | 13  |     | B02 | 0.055556 | mcode |
| Cysteamine      | 13  |     | C02 | 0.055556 | mcode |
| Cysteamine      | 13  |     | D06 | 0.055556 | mcode |
| Cysteamine      | 13  |     | J01 | 0.055556 | mcode |
| Cysteamine      | 13  |     | J05 | 0.055556 | mcode |
| Cysteamine      | 13  |     | L01 | 0.055556 | mcode |
| Cysteamine      | 13  |     | N03 | 0.055556 | mcode |
| Cysteamine      | 13  |     | N04 | 0.055556 | mcode |
| Cysteamine      | 13  |     | N07 | 0.055556 | mcode |
| Cysteamine      | 13  |     | P03 | 0.055556 | mcode |
| Cysteamine      | 13  |     | R07 | 0.055556 | mcode |
| Cysteamine      | 13  |     | S01 | 0.055556 | mcode |
| Cysteamine      | 13  |     | S02 | 0.055556 | mcode |
| Cysteamine      | 13  |     | S03 | 0.055556 | mcode |
| Cysteamine      | 13  |     | V03 | 0.055556 | mcode |
| Diazoxide       | 13  | C02 | A01 | 0.055556 | mcode |
| Diazoxide       | 13  | C02 | A14 | 0.055556 | mcode |
| Diazoxide       | 13  | C02 | B01 | 0.055556 | mcode |
| Diazoxide       | 13  | C02 | B02 | 0.055556 | mcode |
| Diazoxide       | 13  | C02 | D06 | 0.055556 | mcode |
| Diazoxide       | 13  | C02 | J01 | 0.055556 | mcode |
| Diazoxide       | 13  | C02 | J05 | 0.055556 | mcode |
| Diazoxide       | 13  | C02 | L01 | 0.055556 | mcode |
| Diazoxide       | 13  | C02 | N03 | 0.055556 | mcode |
| Diazoxide       | 13  | C02 | N04 | 0.055556 | mcode |
| Diazoxide       | 13  | C02 | N07 | 0.055556 | mcode |

|            |    |     |     |          |       |
|------------|----|-----|-----|----------|-------|
| Diazoxide  | 13 | C02 | P03 | 0.055556 | mcode |
| Diazoxide  | 13 | C02 | R07 | 0.055556 | mcode |
| Diazoxide  | 13 | C02 | S01 | 0.055556 | mcode |
| Diazoxide  | 13 | C02 | S02 | 0.055556 | mcode |
| Diazoxide  | 13 | C02 | S03 | 0.055556 | mcode |
| Diazoxide  | 13 | V03 | A01 | 0.055556 | mcode |
| Diazoxide  | 13 | V03 | A14 | 0.055556 | mcode |
| Diazoxide  | 13 | V03 | B01 | 0.055556 | mcode |
| Diazoxide  | 13 | V03 | B02 | 0.055556 | mcode |
| Diazoxide  | 13 | V03 | D06 | 0.055556 | mcode |
| Diazoxide  | 13 | V03 | J01 | 0.055556 | mcode |
| Diazoxide  | 13 | V03 | J05 | 0.055556 | mcode |
| Diazoxide  | 13 | V03 | L01 | 0.055556 | mcode |
| Diazoxide  | 13 | V03 | N03 | 0.055556 | mcode |
| Diazoxide  | 13 | V03 | N04 | 0.055556 | mcode |
| Diazoxide  | 13 | V03 | N07 | 0.055556 | mcode |
| Diazoxide  | 13 | V03 | P03 | 0.055556 | mcode |
| Diazoxide  | 13 | V03 | R07 | 0.055556 | mcode |
| Diazoxide  | 13 | V03 | S01 | 0.055556 | mcode |
| Diazoxide  | 13 | V03 | S02 | 0.055556 | mcode |
| Diazoxide  | 13 | V03 | S03 | 0.055556 | mcode |
| Didanosine | 13 | J05 | A01 | 0.055556 | mcode |
| Didanosine | 13 | J05 | A14 | 0.055556 | mcode |
| Didanosine | 13 | J05 | B01 | 0.055556 | mcode |
| Didanosine | 13 | J05 | B02 | 0.055556 | mcode |
| Didanosine | 13 | J05 | C02 | 0.055556 | mcode |
| Didanosine | 13 | J05 | D06 | 0.055556 | mcode |
| Didanosine | 13 | J05 | J01 | 0.055556 | mcode |
| Didanosine | 13 | J05 | L01 | 0.055556 | mcode |
| Didanosine | 13 | J05 | N03 | 0.055556 | mcode |
| Didanosine | 13 | J05 | N04 | 0.055556 | mcode |
| Didanosine | 13 | J05 | N07 | 0.055556 | mcode |
| Didanosine | 13 | J05 | P03 | 0.055556 | mcode |
| Didanosine | 13 | J05 | R07 | 0.055556 | mcode |
| Didanosine | 13 | J05 | S01 | 0.055556 | mcode |
| Didanosine | 13 | J05 | S02 | 0.055556 | mcode |
| Didanosine | 13 | J05 | S03 | 0.055556 | mcode |
| Didanosine | 13 | J05 | V03 | 0.055556 | mcode |
| Disulfiram | 13 | N07 | A01 | 0.055556 | mcode |
| Disulfiram | 13 | N07 | A14 | 0.055556 | mcode |
| Disulfiram | 13 | N07 | B01 | 0.055556 | mcode |
| Disulfiram | 13 | N07 | B02 | 0.055556 | mcode |
| Disulfiram | 13 | N07 | C02 | 0.055556 | mcode |
| Disulfiram | 13 | N07 | D06 | 0.055556 | mcode |
| Disulfiram | 13 | N07 | J01 | 0.055556 | mcode |
| Disulfiram | 13 | N07 | J05 | 0.055556 | mcode |
| Disulfiram | 13 | N07 | L01 | 0.055556 | mcode |
| Disulfiram | 13 | N07 | N03 | 0.055556 | mcode |
| Disulfiram | 13 | N07 | N04 | 0.055556 | mcode |
| Disulfiram | 13 | N07 | R07 | 0.055556 | mcode |



|             |    |     |     |          |       |
|-------------|----|-----|-----|----------|-------|
| Disulfiram  | 13 | N07 | S01 | 0.055556 | mcode |
| Disulfiram  | 13 | N07 | S02 | 0.055556 | mcode |
| Disulfiram  | 13 | N07 | S03 | 0.055556 | mcode |
| Disulfiram  | 13 | N07 | V03 | 0.055556 | mcode |
| Disulfiram  | 13 | P03 | A01 | 0.055556 | mcode |
| Disulfiram  | 13 | P03 | A14 | 0.055556 | mcode |
| Disulfiram  | 13 | P03 | B01 | 0.055556 | mcode |
| Disulfiram  | 13 | P03 | B02 | 0.055556 | mcode |
| Disulfiram  | 13 | P03 | C02 | 0.055556 | mcode |
| Disulfiram  | 13 | P03 | D06 | 0.055556 | mcode |
| Disulfiram  | 13 | P03 | J01 | 0.055556 | mcode |
| Disulfiram  | 13 | P03 | J05 | 0.055556 | mcode |
| Disulfiram  | 13 | P03 | L01 | 0.055556 | mcode |
| Disulfiram  | 13 | P03 | N03 | 0.055556 | mcode |
| Disulfiram  | 13 | P03 | N04 | 0.055556 | mcode |
| Disulfiram  | 13 | P03 | R07 | 0.055556 | mcode |
| Disulfiram  | 13 | P03 | S01 | 0.055556 | mcode |
| Disulfiram  | 13 | P03 | S02 | 0.055556 | mcode |
| Disulfiram  | 13 | P03 | S03 | 0.055556 | mcode |
| Disulfiram  | 13 | P03 | V03 | 0.055556 | mcode |
| Gefitinib   | 13 | L01 | A01 | 0.055556 | mcode |
| Gefitinib   | 13 | L01 | A14 | 0.055556 | mcode |
| Gefitinib   | 13 | L01 | B01 | 0.055556 | mcode |
| Gefitinib   | 13 | L01 | B02 | 0.055556 | mcode |
| Gefitinib   | 13 | L01 | C02 | 0.055556 | mcode |
| Gefitinib   | 13 | L01 | D06 | 0.055556 | mcode |
| Gefitinib   | 13 | L01 | J01 | 0.055556 | mcode |
| Gefitinib   | 13 | L01 | J05 | 0.055556 | mcode |
| Gefitinib   | 13 | L01 | N03 | 0.055556 | mcode |
| Gefitinib   | 13 | L01 | N04 | 0.055556 | mcode |
| Gefitinib   | 13 | L01 | N07 | 0.055556 | mcode |
| Gefitinib   | 13 | L01 | P03 | 0.055556 | mcode |
| Gefitinib   | 13 | L01 | R07 | 0.055556 | mcode |
| Gefitinib   | 13 | L01 | S01 | 0.055556 | mcode |
| Gefitinib   | 13 | L01 | S02 | 0.055556 | mcode |
| Gefitinib   | 13 | L01 | S03 | 0.055556 | mcode |
| Gefitinib   | 13 | L01 | V03 | 0.055556 | mcode |
| Mephenytoin | 13 | N03 | A01 | 0.055556 | mcode |
| Mephenytoin | 13 | N03 | A14 | 0.055556 | mcode |
| Mephenytoin | 13 | N03 | B01 | 0.055556 | mcode |
| Mephenytoin | 13 | N03 | B02 | 0.055556 | mcode |
| Mephenytoin | 13 | N03 | C02 | 0.055556 | mcode |
| Mephenytoin | 13 | N03 | D06 | 0.055556 | mcode |
| Mephenytoin | 13 | N03 | J01 | 0.055556 | mcode |
| Mephenytoin | 13 | N03 | J05 | 0.055556 | mcode |
| Mephenytoin | 13 | N03 | L01 | 0.055556 | mcode |
| Mephenytoin | 13 | N03 | N04 | 0.055556 | mcode |
| Mephenytoin | 13 | N03 | N07 | 0.055556 | mcode |
| Mephenytoin | 13 | N03 | P03 | 0.055556 | mcode |
| Mephenytoin | 13 | N03 | R07 | 0.055556 | mcode |

|              |    |     |     |          |       |
|--------------|----|-----|-----|----------|-------|
| Mephenytoin  | 13 | N03 | S01 | 0.055556 | mcode |
| Mephenytoin  | 13 | N03 | S02 | 0.055556 | mcode |
| Mephenytoin  | 13 | N03 | S03 | 0.055556 | mcode |
| Mephenytoin  | 13 | N03 | V03 | 0.055556 | mcode |
| Nitric Oxide | 13 | R07 | A01 | 0.055556 | mcode |
| Nitric Oxide | 13 | R07 | A14 | 0.055556 | mcode |
| Nitric Oxide | 13 | R07 | B01 | 0.055556 | mcode |
| Nitric Oxide | 13 | R07 | B02 | 0.055556 | mcode |
| Nitric Oxide | 13 | R07 | C02 | 0.055556 | mcode |
| Nitric Oxide | 13 | R07 | D06 | 0.055556 | mcode |
| Nitric Oxide | 13 | R07 | J01 | 0.055556 | mcode |
| Nitric Oxide | 13 | R07 | J05 | 0.055556 | mcode |
| Nitric Oxide | 13 | R07 | L01 | 0.055556 | mcode |
| Nitric Oxide | 13 | R07 | N03 | 0.055556 | mcode |
| Nitric Oxide | 13 | R07 | N04 | 0.055556 | mcode |
| Nitric Oxide | 13 | R07 | N07 | 0.055556 | mcode |
| Nitric Oxide | 13 | R07 | P03 | 0.055556 | mcode |
| Nitric Oxide | 13 | R07 | S01 | 0.055556 | mcode |
| Nitric Oxide | 13 | R07 | S02 | 0.055556 | mcode |
| Nitric Oxide | 13 | R07 | S03 | 0.055556 | mcode |
| Nitric Oxide | 13 | R07 | V03 | 0.055556 | mcode |
| Oxandrolone  | 13 | A14 | A01 | 0.055556 | mcode |
| Oxandrolone  | 13 | A14 | B01 | 0.055556 | mcode |
| Oxandrolone  | 13 | A14 | B02 | 0.055556 | mcode |
| Oxandrolone  | 13 | A14 | C02 | 0.055556 | mcode |
| Oxandrolone  | 13 | A14 | D06 | 0.055556 | mcode |
| Oxandrolone  | 13 | A14 | J01 | 0.055556 | mcode |
| Oxandrolone  | 13 | A14 | J05 | 0.055556 | mcode |
| Oxandrolone  | 13 | A14 | L01 | 0.055556 | mcode |
| Oxandrolone  | 13 | A14 | N03 | 0.055556 | mcode |
| Oxandrolone  | 13 | A14 | N04 | 0.055556 | mcode |
| Oxandrolone  | 13 | A14 | N07 | 0.055556 | mcode |
| Oxandrolone  | 13 | A14 | P03 | 0.055556 | mcode |
| Oxandrolone  | 13 | A14 | R07 | 0.055556 | mcode |
| Oxandrolone  | 13 | A14 | S01 | 0.055556 | mcode |
| Oxandrolone  | 13 | A14 | S02 | 0.055556 | mcode |
| Oxandrolone  | 13 | A14 | S03 | 0.055556 | mcode |
| Oxandrolone  | 13 | A14 | V03 | 0.055556 | mcode |
| Procyclidine | 13 | N04 | A01 | 0.055556 | mcode |
| Procyclidine | 13 | N04 | A14 | 0.055556 | mcode |
| Procyclidine | 13 | N04 | B01 | 0.055556 | mcode |
| Procyclidine | 13 | N04 | B02 | 0.055556 | mcode |
| Procyclidine | 13 | N04 | C02 | 0.055556 | mcode |
| Procyclidine | 13 | N04 | D06 | 0.055556 | mcode |
| Procyclidine | 13 | N04 | J01 | 0.055556 | mcode |
| Procyclidine | 13 | N04 | J05 | 0.055556 | mcode |
| Procyclidine | 13 | N04 | L01 | 0.055556 | mcode |
| Procyclidine | 13 | N04 | N03 | 0.055556 | mcode |
| Procyclidine | 13 | N04 | N07 | 0.055556 | mcode |
| Procyclidine | 13 | N04 | P03 | 0.055556 | mcode |

|              |    |     |     |          |       |
|--------------|----|-----|-----|----------|-------|
| Procyclidine | 13 | N04 | R07 | 0.055556 | mcode |
| Procyclidine | 13 | N04 | S01 | 0.055556 | mcode |
| Procyclidine | 13 | N04 | S02 | 0.055556 | mcode |
| Procyclidine | 13 | N04 | S03 | 0.055556 | mcode |
| Procyclidine | 13 | N04 | V03 | 0.055556 | mcode |
| Tetracycline | 13 | A01 | A14 | 0.055556 | mcode |
| Tetracycline | 13 | A01 | B01 | 0.055556 | mcode |
| Tetracycline | 13 | A01 | B02 | 0.055556 | mcode |
| Tetracycline | 13 | A01 | C02 | 0.055556 | mcode |
| Tetracycline | 13 | A01 | J05 | 0.055556 | mcode |
| Tetracycline | 13 | A01 | L01 | 0.055556 | mcode |
| Tetracycline | 13 | A01 | N03 | 0.055556 | mcode |
| Tetracycline | 13 | A01 | N04 | 0.055556 | mcode |
| Tetracycline | 13 | A01 | N07 | 0.055556 | mcode |
| Tetracycline | 13 | A01 | P03 | 0.055556 | mcode |
| Tetracycline | 13 | A01 | R07 | 0.055556 | mcode |
| Tetracycline | 13 | A01 | V03 | 0.055556 | mcode |
| Tetracycline | 13 | D06 | A14 | 0.055556 | mcode |
| Tetracycline | 13 | D06 | B01 | 0.055556 | mcode |
| Tetracycline | 13 | D06 | B02 | 0.055556 | mcode |
| Tetracycline | 13 | D06 | C02 | 0.055556 | mcode |
| Tetracycline | 13 | D06 | J05 | 0.055556 | mcode |
| Tetracycline | 13 | D06 | L01 | 0.055556 | mcode |
| Tetracycline | 13 | D06 | N03 | 0.055556 | mcode |
| Tetracycline | 13 | D06 | N04 | 0.055556 | mcode |
| Tetracycline | 13 | D06 | N07 | 0.055556 | mcode |
| Tetracycline | 13 | D06 | P03 | 0.055556 | mcode |
| Tetracycline | 13 | D06 | R07 | 0.055556 | mcode |
| Tetracycline | 13 | D06 | V03 | 0.055556 | mcode |
| Tetracycline | 13 | J01 | A14 | 0.055556 | mcode |
| Tetracycline | 13 | J01 | B01 | 0.055556 | mcode |
| Tetracycline | 13 | J01 | B02 | 0.055556 | mcode |
| Tetracycline | 13 | J01 | C02 | 0.055556 | mcode |
| Tetracycline | 13 | J01 | J05 | 0.055556 | mcode |
| Tetracycline | 13 | J01 | L01 | 0.055556 | mcode |
| Tetracycline | 13 | J01 | N03 | 0.055556 | mcode |
| Tetracycline | 13 | J01 | N04 | 0.055556 | mcode |
| Tetracycline | 13 | J01 | N07 | 0.055556 | mcode |
| Tetracycline | 13 | J01 | P03 | 0.055556 | mcode |
| Tetracycline | 13 | J01 | R07 | 0.055556 | mcode |
| Tetracycline | 13 | J01 | V03 | 0.055556 | mcode |
| Tetracycline | 13 | S01 | A14 | 0.055556 | mcode |
| Tetracycline | 13 | S01 | B01 | 0.055556 | mcode |
| Tetracycline | 13 | S01 | B02 | 0.055556 | mcode |
| Tetracycline | 13 | S01 | C02 | 0.055556 | mcode |
| Tetracycline | 13 | S01 | J05 | 0.055556 | mcode |
| Tetracycline | 13 | S01 | L01 | 0.055556 | mcode |
| Tetracycline | 13 | S01 | N03 | 0.055556 | mcode |
| Tetracycline | 13 | S01 | N04 | 0.055556 | mcode |
| Tetracycline | 13 | S01 | N07 | 0.055556 | mcode |

|              |    |     |     |          |       |
|--------------|----|-----|-----|----------|-------|
| Tetracycline | 13 | S01 | P03 | 0.055556 | mcode |
| Tetracycline | 13 | S01 | R07 | 0.055556 | mcode |
| Tetracycline | 13 | S01 | V03 | 0.055556 | mcode |
| Tetracycline | 13 | S02 | A14 | 0.055556 | mcode |
| Tetracycline | 13 | S02 | B01 | 0.055556 | mcode |
| Tetracycline | 13 | S02 | B02 | 0.055556 | mcode |
| Tetracycline | 13 | S02 | C02 | 0.055556 | mcode |
| Tetracycline | 13 | S02 | J05 | 0.055556 | mcode |
| Tetracycline | 13 | S02 | L01 | 0.055556 | mcode |
| Tetracycline | 13 | S02 | N03 | 0.055556 | mcode |
| Tetracycline | 13 | S02 | N04 | 0.055556 | mcode |
| Tetracycline | 13 | S02 | N07 | 0.055556 | mcode |
| Tetracycline | 13 | S02 | P03 | 0.055556 | mcode |
| Tetracycline | 13 | S02 | R07 | 0.055556 | mcode |
| Tetracycline | 13 | S02 | V03 | 0.055556 | mcode |
| Tetracycline | 13 | S03 | A14 | 0.055556 | mcode |
| Tetracycline | 13 | S03 | B01 | 0.055556 | mcode |
| Tetracycline | 13 | S03 | B02 | 0.055556 | mcode |
| Tetracycline | 13 | S03 | C02 | 0.055556 | mcode |
| Tetracycline | 13 | S03 | J05 | 0.055556 | mcode |
| Tetracycline | 13 | S03 | L01 | 0.055556 | mcode |
| Tetracycline | 13 | S03 | N03 | 0.055556 | mcode |
| Tetracycline | 13 | S03 | N04 | 0.055556 | mcode |
| Tetracycline | 13 | S03 | N07 | 0.055556 | mcode |
| Tetracycline | 13 | S03 | P03 | 0.055556 | mcode |
| Tetracycline | 13 | S03 | R07 | 0.055556 | mcode |
| Tetracycline | 13 | S03 | V03 | 0.055556 | mcode |
