# Supplementary material for: A two-tiered unsupervised clustering approach for drug repositioning through heterogeneous data integration
Source: Springer Nature journal article supplement (doi:10.1186/s12859-018-2123-4), 2018-04-11
Supplement: 12859_2018_2123_MOESM5_ESM.pdf [file 12859_2018_2123_MOESM5_ESM.pdf]

| <b>ATC code</b> | <b>ATC therapeutic class name</b>                                                       |
|-----------------|-----------------------------------------------------------------------------------------|
| A01             | <a href="#"><u>STOMATOLOGICAL PREPARATIONS</u></a>                                      |
| A02             | <a href="#"><u>DRUGS FOR ACID RELATED DISORDERS</u></a>                                 |
| A03             | <a href="#"><u>DRUGS FOR FUNCTIONAL GASTROINTESTINAL DISORDERS</u></a>                  |
| A04             | <a href="#"><u>ANTIEMETICS AND ANTINAUSEANTS</u></a>                                    |
| A05             | <a href="#"><u>BILE AND LIVER THERAPY</u></a>                                           |
| A06             | <a href="#"><u>DRUGS FOR CONSTIPATION</u></a>                                           |
| A07             | <a href="#"><u>ANTIDIARRHEALS, INTESTINAL ANTIINFLAMMATORY/ANTIINFECTIVE AGENTS</u></a> |
| A08             | <a href="#"><u>ANTI OBESITY PREPARATIONS, EXCL. DIET PRODUCTS</u></a>                   |
| A09             | <a href="#"><u>DIGESTIVES, INCL. ENZYMES</u></a>                                        |
| A10             | <a href="#"><u>DRUGS USED IN DIABETES</u></a>                                           |
| A11             | <a href="#"><u>VITAMINS</u></a>                                                         |
| A12             | <a href="#"><u>MINERAL SUPPLEMENTS</u></a>                                              |
| A13             | <a href="#"><u>TONICS</u></a>                                                           |
| A14             | <a href="#"><u>ANABOLIC AGENTS FOR SYSTEMIC USE</u></a>                                 |
| A15             | <a href="#"><u>APPETITE STIMULANTS</u></a>                                              |
| A16             | <a href="#"><u>OTHER ALIMENTARY TRACT AND METABOLISM PRODUCTS</u></a>                   |
| B01             | <a href="#"><u>ANTITHROMBOTIC AGENTS</u></a>                                            |
| B02             | <a href="#"><u>ANTIHEMORRHAGICS</u></a>                                                 |
| B03             | <a href="#"><u>ANTI ANEMIC PREPARATIONS</u></a>                                         |
| B05             | <a href="#"><u>BLOOD SUBSTITUTES AND PERFUSION SOLUTIONS</u></a>                        |
| B06             | <a href="#"><u>OTHER HEMATOLOGICAL AGENTS</u></a>                                       |
| C01             | <a href="#"><u>CARDIAC THERAPY</u></a>                                                  |
| C02             | <a href="#"><u>ANTI HYPERTENSIVES</u></a>                                               |
| C03             | <a href="#"><u>DIURETICS</u></a>                                                        |
| C04             | <a href="#"><u>PERIPHERAL VASODILATORS</u></a>                                          |
| C05             | <a href="#"><u>VASOPROTECTIVES</u></a>                                                  |
| C07             | <a href="#"><u>BETA BLOCKING AGENTS</u></a>                                             |
| C08             | <a href="#"><u>CALCIUM CHANNEL BLOCKERS</u></a>                                         |
| C09             | <a href="#"><u>AGENTS ACTING ON THE RENIN-ANGIOTENSIN SYSTEM</u></a>                    |
| C10             | <a href="#"><u>LIPID MODIFYING AGENTS</u></a>                                           |
| D01             | <a href="#"><u>ANTIFUNGALS FOR DERMATOLOGICAL USE</u></a>                               |
| D02             | <a href="#"><u>EMOLLIENTS AND PROTECTIVES</u></a>                                       |
| D03             | <a href="#"><u>PREPARATIONS FOR TREATMENT OF WOUNDS AND ULCERS</u></a>                  |
| D04             | <a href="#"><u>ANTI PRURITICS, INCL. ANTIHISTAMINES, ANESTHETICS, ETC.</u></a>          |
| D05             | <a href="#"><u>ANTIPSORIATICS</u></a>                                                   |
| D06             | <a href="#"><u>ANTIBIOTICS AND CHEMOTHERAPEUTICS FOR DERMATOLOGICAL USE</u></a>         |
| D07             | <a href="#"><u>CORTICOSTEROIDS, DERMATOLOGICAL PREPARATIONS</u></a>                     |
| D08             | <a href="#"><u>ANTISEPTICS AND DISINFECTANTS</u></a>                                    |
| D09             | <a href="#"><u>MEDICATED DRESSINGS</u></a>                                              |
| D10             | <a href="#"><u>ANTI-ACNE PREPARATIONS</u></a>                                           |
| D11             | <a href="#"><u>OTHER DERMATOLOGICAL PREPARATIONS</u></a>                                |
| G01             | <a href="#"><u>GYNECOLOGICAL ANTIINFECTIVES AND ANTISEPTICS</u></a>                     |
| G02             | <a href="#"><u>OTHER GYNECOLOGICALS</u></a>                                             |
| G03             | <a href="#"><u>SEX HORMONES AND MODULATORS OF THE GENITAL SYSTEM</u></a>                |
| G04             | <a href="#"><u>UROLOGICALS</u></a>                                                      |
| H01             | <a href="#"><u>PITUITARY AND HYPOTHALAMIC HORMONES AND ANALOGUES</u></a>                |
| H02             | <a href="#"><u>CORTICOSTEROIDS FOR SYSTEMIC USE</u></a>                                 |
| H03             | <a href="#"><u>THYROID THERAPY</u></a>                                                  |
| H04             | <a href="#"><u>PANCREATIC HORMONES</u></a>                                              |

|     |                                                                                         |
|-----|-----------------------------------------------------------------------------------------|
| H05 | <a href="#"><u>CALCIUM HOMEOSTASIS</u></a>                                              |
| J01 | <a href="#"><u>ANTIBACTERIALS FOR SYSTEMIC USE</u></a>                                  |
| J02 | <a href="#"><u>ANTIMYCOTICS FOR SYSTEMIC USE</u></a>                                    |
| J04 | <a href="#"><u>ANTIMYCOBACTERIALS</u></a>                                               |
| J05 | <a href="#"><u>ANTIVIRALS FOR SYSTEMIC USE</u></a>                                      |
| J06 | <a href="#"><u>IMMUNE SERA AND IMMUNOGLOBULINS</u></a>                                  |
| J07 | <a href="#"><u>VACCINES</u></a>                                                         |
| L01 | <a href="#"><u>ANTINEOPLASTIC AGENTS</u></a>                                            |
| L02 | <a href="#"><u>ENDOCRINE THERAPY</u></a>                                                |
| L03 | <a href="#"><u>IMMUNOSTIMULANTS</u></a>                                                 |
| L04 | <a href="#"><u>IMMUNOSUPPRESSANTS</u></a>                                               |
| M01 | <a href="#"><u>ANTIINFLAMMATORY AND ANTIRHEUMATIC PRODUCTS</u></a>                      |
| M02 | <a href="#"><u>TOPICAL PRODUCTS FOR JOINT AND MUSCULAR PAIN</u></a>                     |
| M03 | <a href="#"><u>MUSCLE RELAXANTS</u></a>                                                 |
| M04 | <a href="#"><u>ANTIGOUT PREPARATIONS</u></a>                                            |
| M05 | <a href="#"><u>DRUGS FOR TREATMENT OF BONE DISEASES</u></a>                             |
| M09 | <a href="#"><u>OTHER DRUGS FOR DISORDERS OF THE MUSCULO-SKELETAL SYSTEM</u></a>         |
| N01 | <a href="#"><u>ANESTHETICS</u></a>                                                      |
| N02 | <a href="#"><u>ANALGESICS</u></a>                                                       |
| N03 | <a href="#"><u>ANTIEPILEPTICS</u></a>                                                   |
| N04 | <a href="#"><u>ANTI-PARKINSON DRUGS</u></a>                                             |
| N05 | <a href="#"><u>PSYCHOLEPTICS</u></a>                                                    |
| N06 | <a href="#"><u>PSYCHOANALEPTICS</u></a>                                                 |
| N07 | <a href="#"><u>OTHER NERVOUS SYSTEM DRUGS</u></a>                                       |
| P01 | <a href="#"><u>ANTIPROTOZOALS</u></a>                                                   |
| P02 | <a href="#"><u>ANTHELMINTICS</u></a>                                                    |
| P03 | <a href="#"><u>ECTOPARASITICIDES, INCL. SCABICIDES, INSECTICIDES AND REPELLENTS</u></a> |
| R01 | <a href="#"><u>NASAL PREPARATIONS</u></a>                                               |
| R02 | <a href="#"><u>THROAT PREPARATIONS</u></a>                                              |
| R03 | <a href="#"><u>DRUGS FOR OBSTRUCTIVE AIRWAY DISEASES</u></a>                            |
| R05 | <a href="#"><u>COUGH AND COLD PREPARATIONS</u></a>                                      |
| R06 | <a href="#"><u>ANTIHISTAMINES FOR SYSTEMIC USE</u></a>                                  |
| R07 | <a href="#"><u>OTHER RESPIRATORY SYSTEM PRODUCTS</u></a>                                |
| S01 | <a href="#"><u>OPHTHALMOLOGICALS</u></a>                                                |
| S02 | <a href="#"><u>OTOLOGICALS</u></a>                                                      |
| S03 | <a href="#"><u>OPHTHALMOLOGICAL AND OTOLOGICAL PREPARATIONS</u></a>                     |
| V01 | <a href="#"><u>ALLERGENS</u></a>                                                        |
| V03 | <a href="#"><u>ALL OTHER THERAPEUTIC PRODUCTS</u></a>                                   |
| V04 | <a href="#"><u>DIAGNOSTIC AGENTS</u></a>                                                |
| V06 | <a href="#"><u>GENERAL NUTRIENTS</u></a>                                                |
| V07 | <a href="#"><u>ALL OTHER NON-THERAPEUTIC PRODUCTS</u></a>                               |
| V08 | <a href="#"><u>CONTRAST MEDIA</u></a>                                                   |
| V09 | <a href="#"><u>DIAGNOSTIC RADIOPHARMACEUTICALS</u></a>                                  |
| V10 | <a href="#"><u>THERAPEUTIC RADIOPHARMACEUTICALS</u></a>                                 |
| V20 | <a href="#"><u>SURGICAL DRESSINGS</u></a>                                               |
